# Supplementary material for: Formation of methylglyoxal (CH3C(O)CHO) in interstellar analog ices – a key intermediate in cellular metabolism
Source: Royal Society of Chemistry journal article supplement (doi:10.1039/d4cp02779e), 2024-01-01
Supplement: d4cp02779e1.pdf [file d4cp02779e1.pdf]

## Supporting Information for

### **Formation of Methylglyoxal (CH<sub>3</sub>C(O)CHO) in Interstellar Analog Ices – A Key Intermediate in Cellular Metabolism**

Jia Wang,<sup>1,2</sup> Joshua H. Marks,<sup>1,2</sup> Evgenia A. Batrakova,<sup>3</sup> Sergey O. Tuchin,<sup>3</sup> Ivan O. Antonov,<sup>3\*</sup>  
Ralf I. Kaiser<sup>1,2\*</sup>

<sup>1</sup> W. M. Keck Research Laboratory in Astrochemistry, University of Hawaii at Manoa,  
Honolulu, HI 96822, USA

<sup>2</sup> Department of Chemistry, University of Hawaii at Manoa, Honolulu, HI 96822, USA

<sup>3</sup> Samara National Research University, Samara 443086, Russia

\*Corresponding Authors:

Ivan Antonov, [pfizeke@gmail.com](mailto:pfizeke@gmail.com)

Ralf I. Kaiser, [ralfk@hawaii.edu](mailto:ralfk@hawaii.edu)

This file includes:

Figures S1 to S10

Tables S1 to S15

Supplementary Source code

Supplementary References

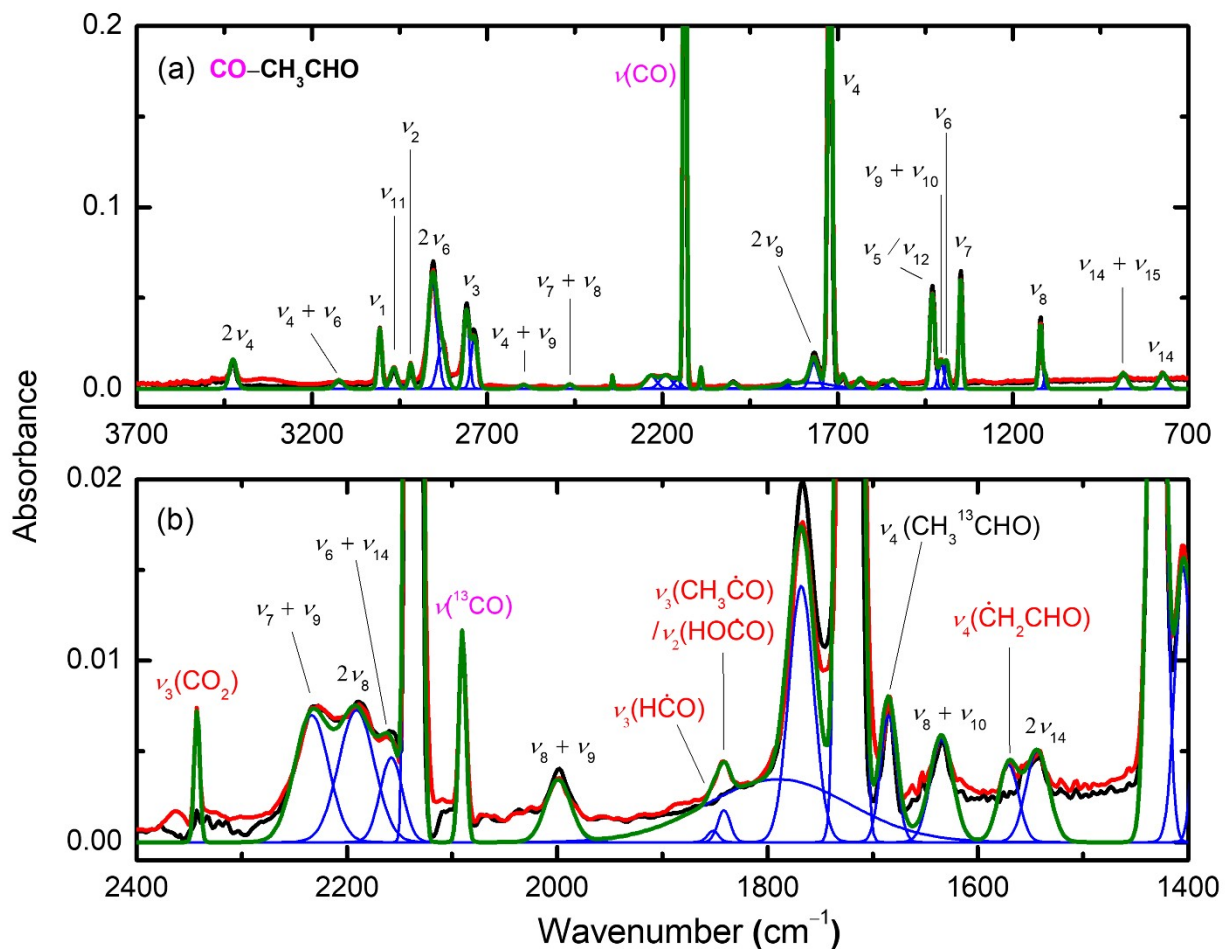

**Figure S1.** Infrared spectra of (a) CO-CH<sub>3</sub>CHO ice before (black) and after (red) low dose irradiation (24 nA, 5 minutes) at 5 K with (b) a magnified view and deconvolution of the region 2400–1400 cm<sup>-1</sup>. The Gaussian fits (blue) and sum of fits (green) are presented. The assignments of the absorptions of CO, CH<sub>3</sub>CHO, and new absorptions after irradiation are labeled in magenta, black, and red, respectively. Detailed assignments are compiled in Table S9.

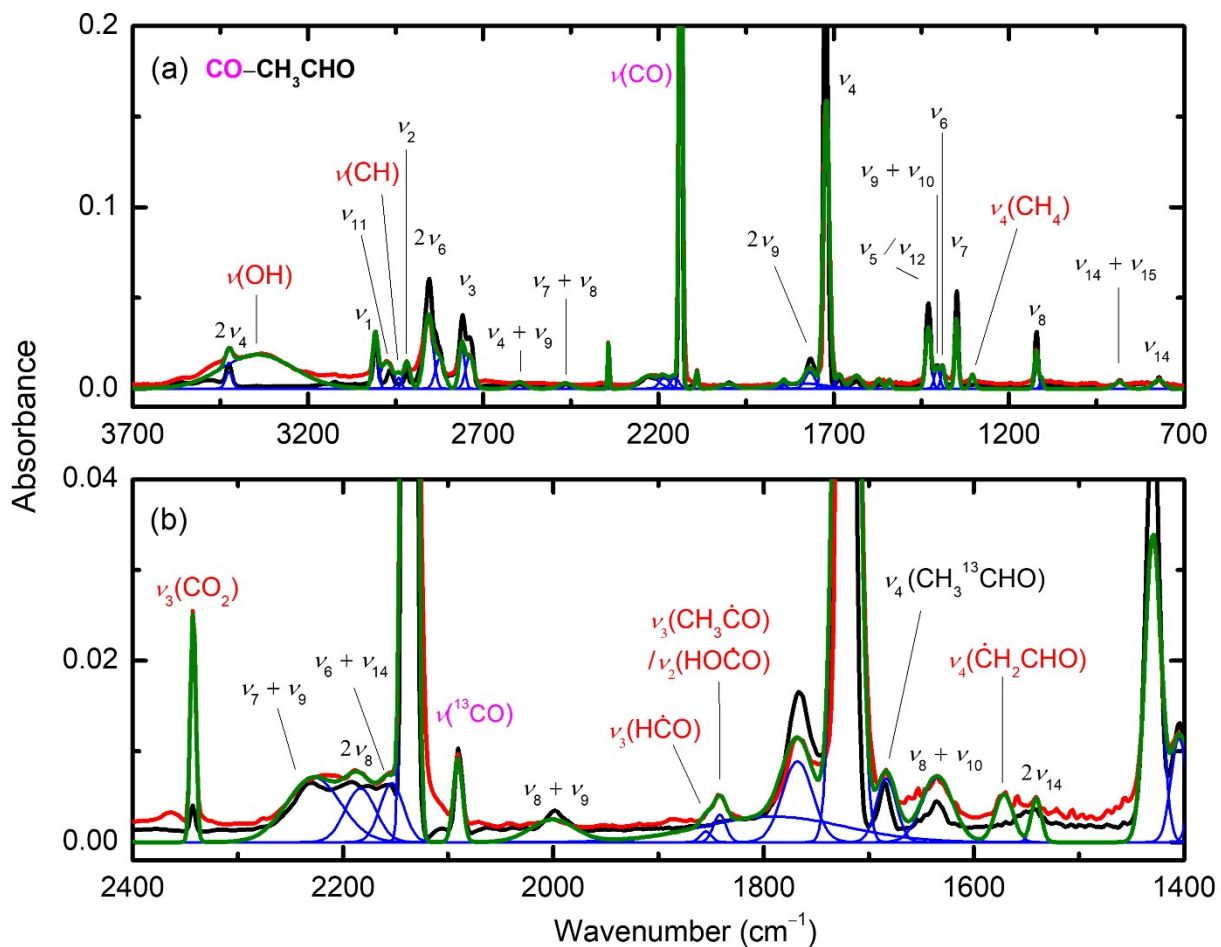

**Figure S2.** Infrared spectra of (a) CO-CH<sub>3</sub>CHO ice before (black) and after (red) high dose irradiation (37 nA, 30 minutes) at 5 K with (b) a magnified view and deconvolution of the region 2400–1400 cm<sup>-1</sup>. The Gaussian fits (blue) and sum of fits (green) are presented. The assignments of the absorptions of CO, CH<sub>3</sub>CHO, and new absorptions after irradiation are labeled in magenta, black, and red, respectively. Detailed assignments are compiled in Table S10.

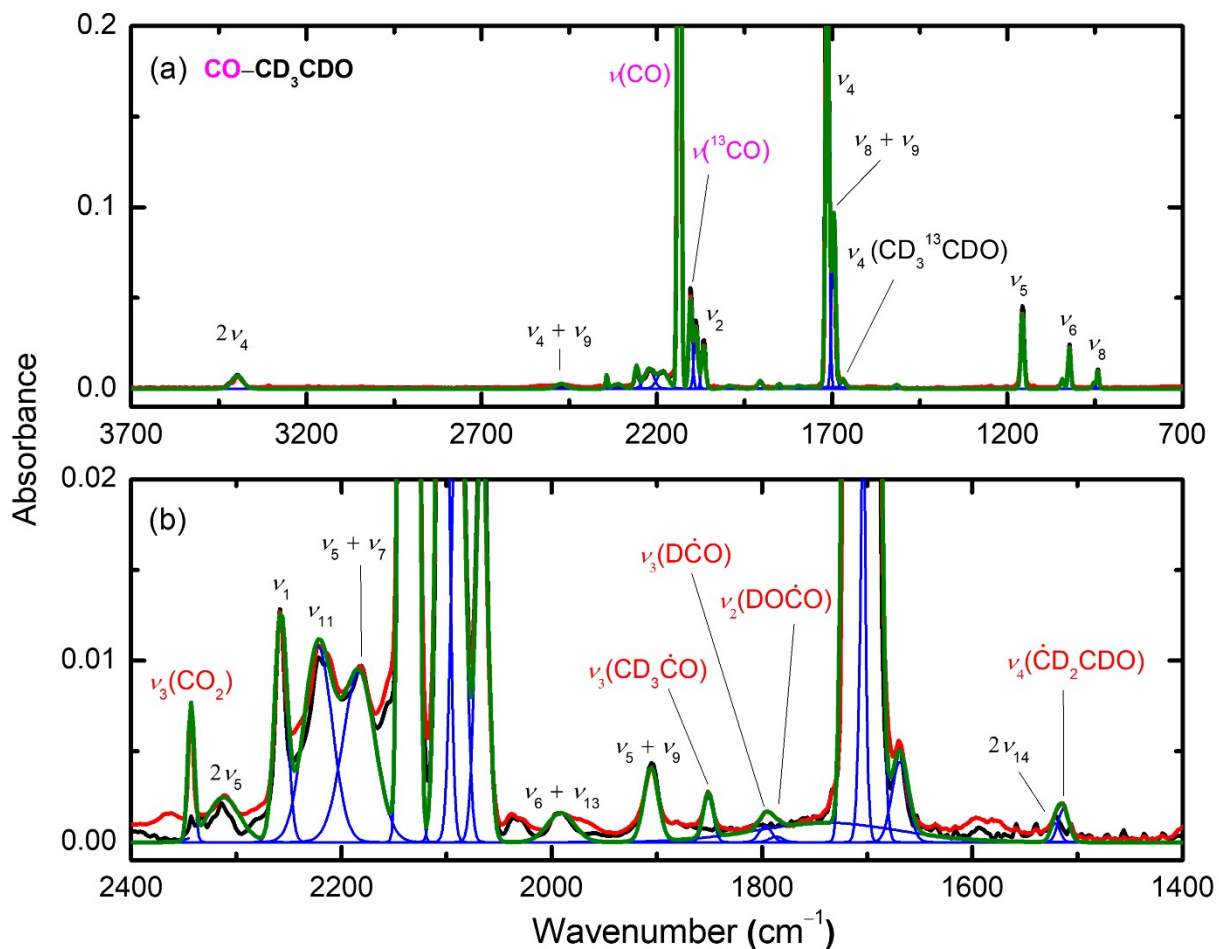

**Figure S3.** Infrared spectra of (a) CO-CD<sub>3</sub>CDO ice before (black) and after (red) low dose irradiation (23 nA, 5 minutes) at 5 K with (b) a magnified view and deconvolution of the region 2400–1400 cm<sup>-1</sup>. The Gaussian fits (blue) and sum of fits (green) are presented. The assignments of the absorptions of CO, CD<sub>3</sub>CDO, and new absorptions after irradiation are labeled in magenta, black, and red, respectively. Detailed assignments are compiled in Table S11.

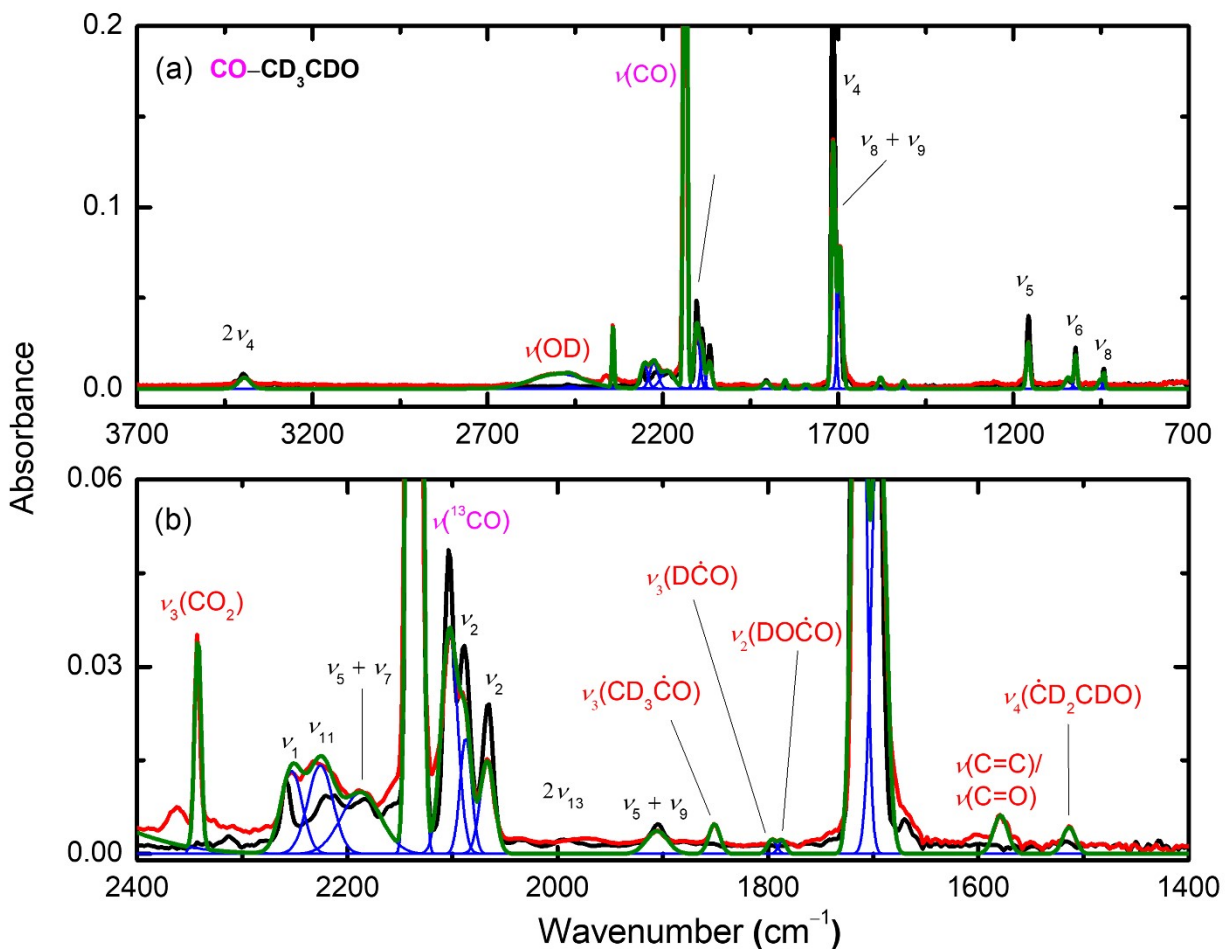

**Figure S4.** Infrared spectra of (a) CO-CD<sub>3</sub>CDO ice before (black) and after (red) high dose irradiation (37 nA, 30 minutes) at 5 K with (b) a magnified view and deconvolution of the region 2400–1400 cm<sup>-1</sup>. The Gaussian fits (blue) and sum of fits (green) are presented. The assignments of the absorptions of CO, CD<sub>3</sub>CDO, and new absorptions after irradiation are labeled in magenta, black, and red, respectively. Detailed assignments are compiled in Table S12.

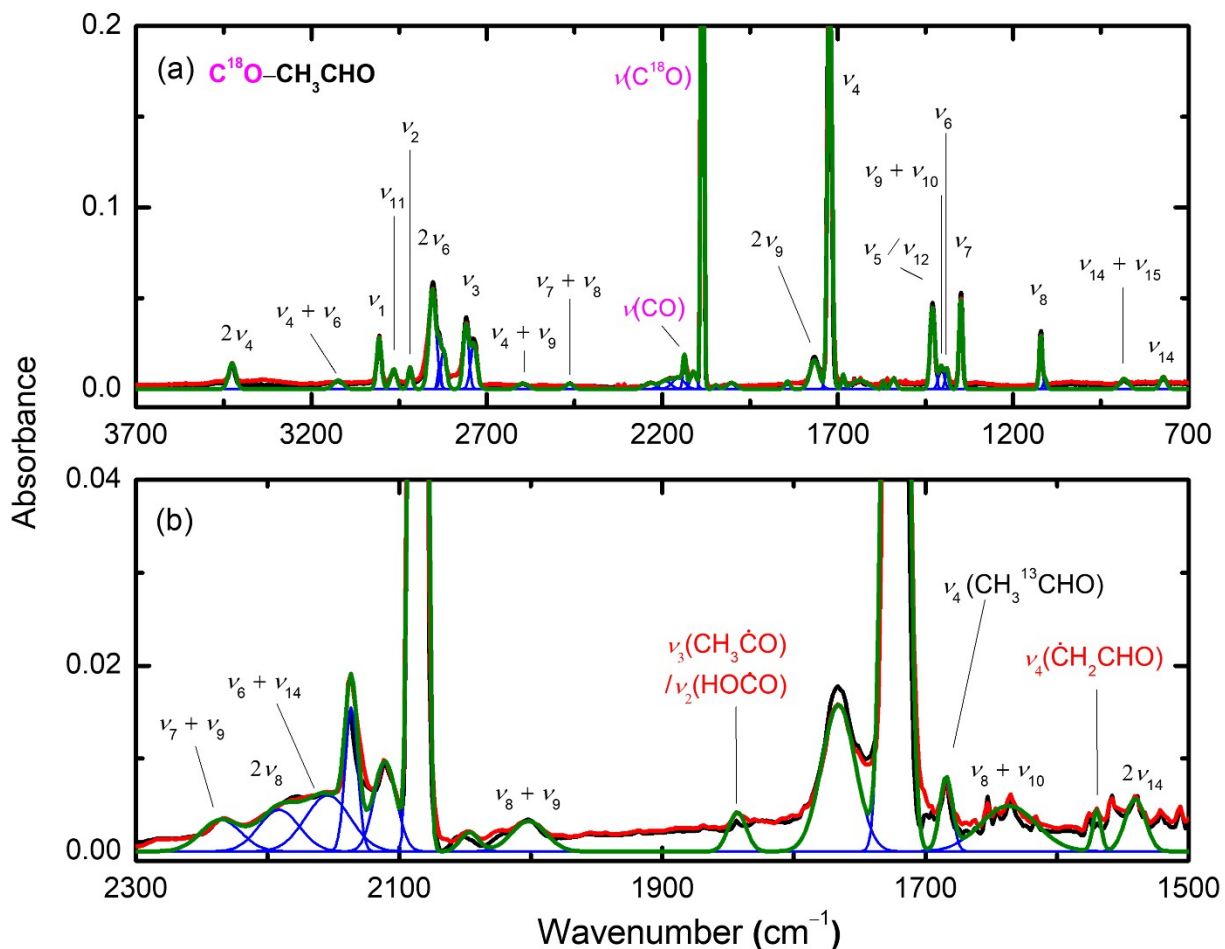

**Figure S5.** Infrared spectra of (a)  $C^{18}O-CH_3CHO$  ice before (black) and after (red) low dose irradiation (22 nA, 5 minutes) at 5 K with (b) a magnified view and deconvolution of the region 2300–1500  $cm^{-1}$ . The Gaussian fits (blue) and sum of fits (green) are presented. The assignments of the absorptions of  $C^{18}O$ ,  $CH_3CHO$ , and new absorptions after irradiation are labeled in magenta, black, and red, respectively. Detailed assignments are compiled in Table S13.

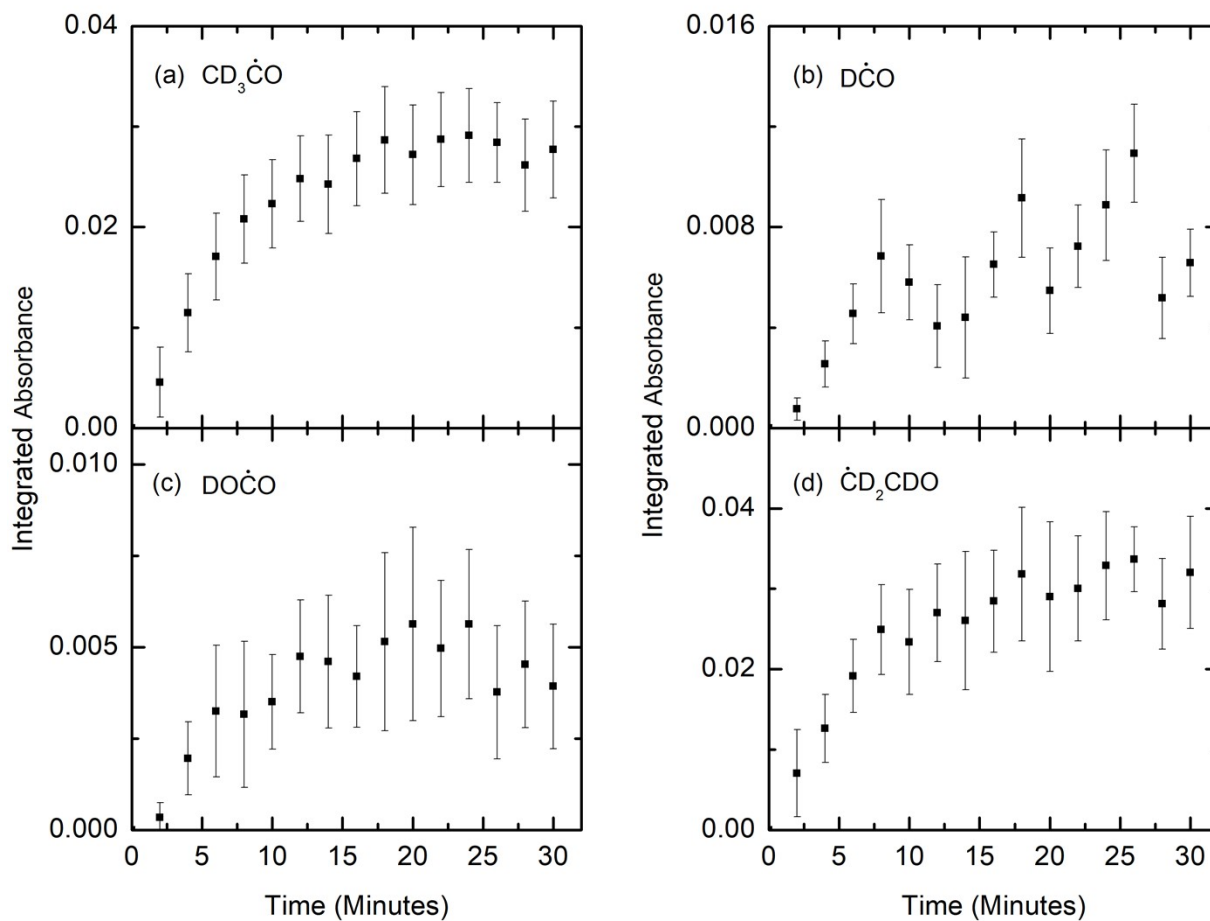

**Figure S6.** Temporal evolution of three radicals formed during irradiation of CO–CD<sub>3</sub>CDO ice at 5 K: (a) **14-d<sub>3</sub>** (CD<sub>3</sub>C•O, 1851 cm<sup>-1</sup>), (b) **13-d<sub>1</sub>** (D•CO, 1794 cm<sup>-1</sup>), (c) hydroxycarbonyl-d<sub>1</sub> (DO•CO, 1786 cm<sup>-1</sup>), and **17-d<sub>3</sub>** (C•D<sub>2</sub>CDO, 1513 cm<sup>-1</sup>).

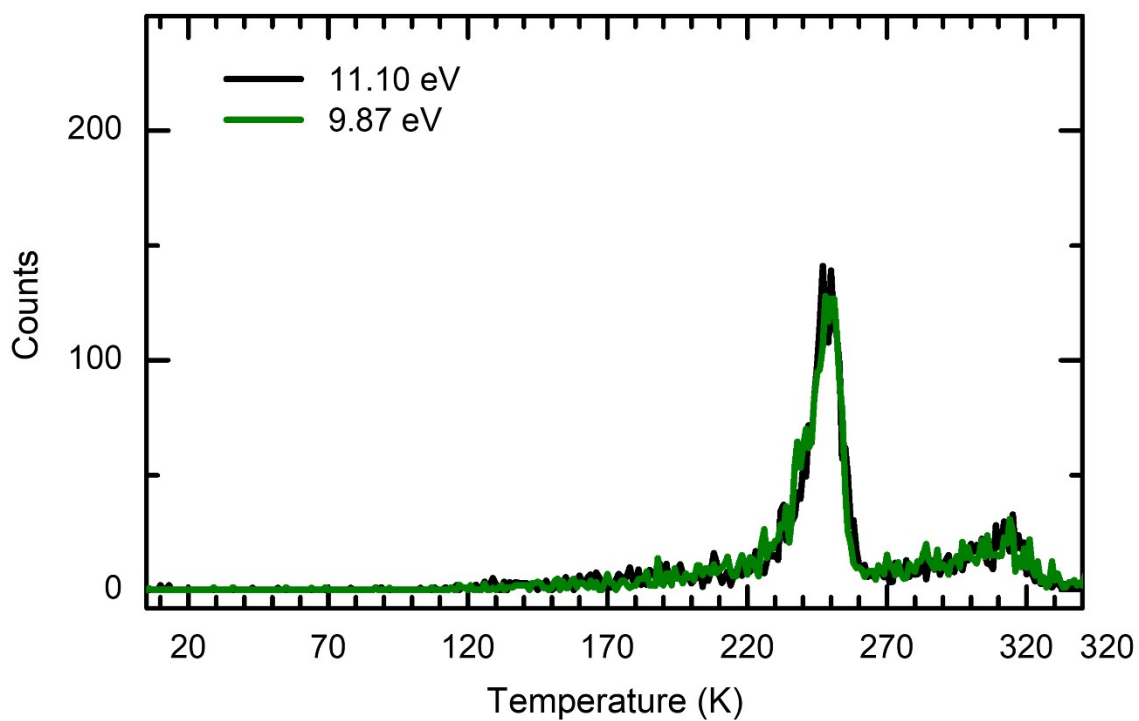

**Figure S7.** TPD profiles of  $m/z = 72$  in low dose irradiated CO-CH<sub>3</sub>CHO ice recorded at 11.10 eV and 9.87 eV match well, ruling out the formation of **18**.



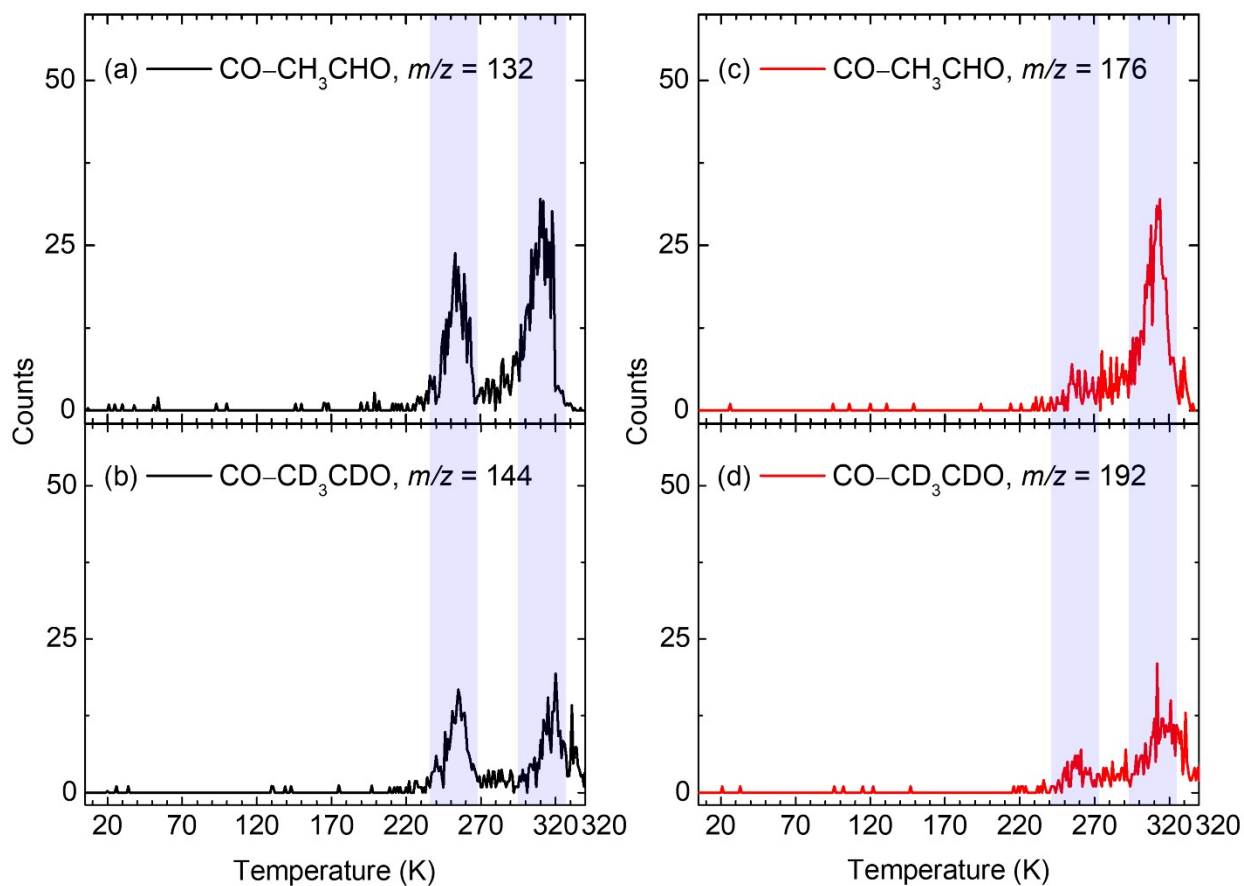

**Figure S8.** TPD profiles recorded at 11.10 eV with irradiated CO-CH<sub>3</sub>CHO ice ( $m/z = 132$  and 176) and CO-CD<sub>3</sub>CDO ice ( $m/z = 144$  and 192), confirming the formulae C<sub>6</sub>H<sub>12</sub>O<sub>3</sub> ((a) and (b)) and C<sub>8</sub>H<sub>16</sub>O<sub>4</sub> ((c) and (d)). The blue shaded regions indicate the sublimation temperatures of Peaks I and II.

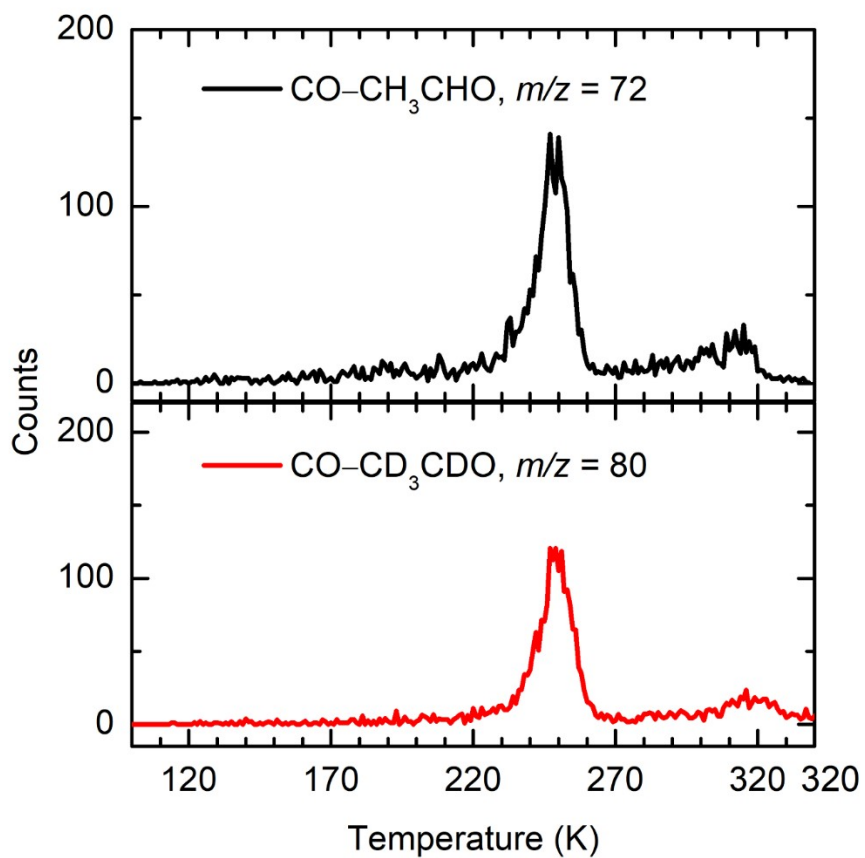

**Figure S9.** TPD profiles recorded at 11.10 eV with irradiated  $\text{CO-CH}_3\text{CHO}$  ice ( $m/z = 72$ ) and  $\text{CO-CD}_3\text{CDO}$  ice ( $m/z = 80$ ), indicating that  $\text{C}_4\text{H}_8\text{O}$  isomers contribute to Peaks I and II.

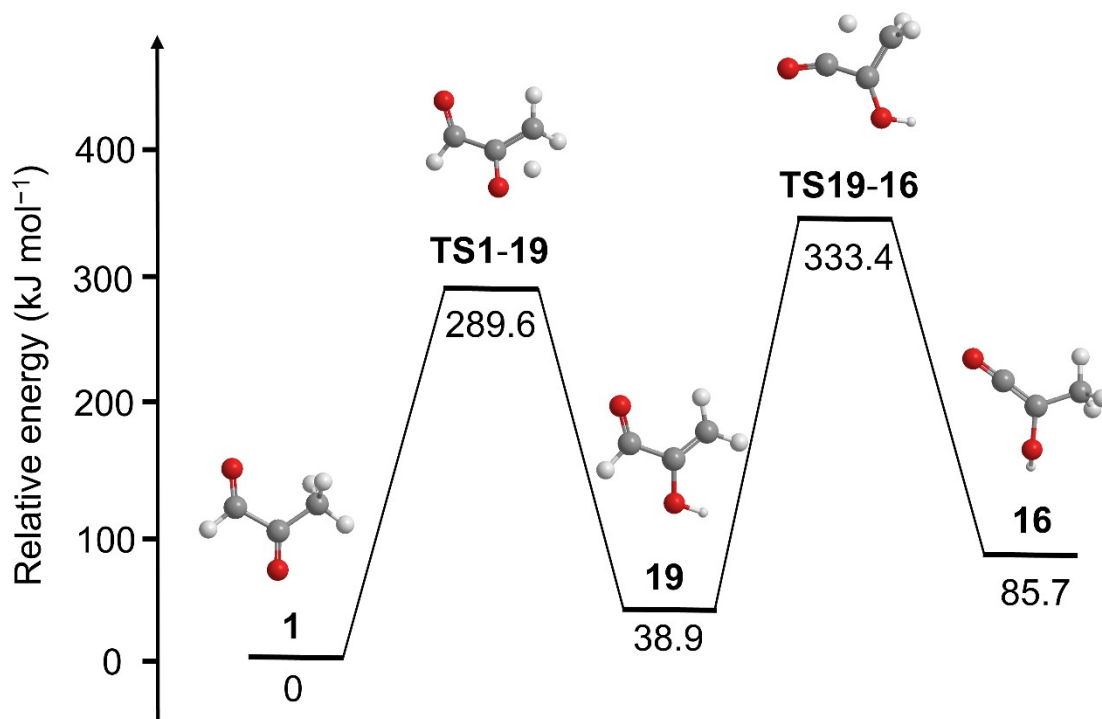

**Figure S10.** Potential energy surfaces of isomerization of methylglyoxal (**1**) leading to the formation of 2-hydroxypropanal (**19**) and 2-hydroxypropanone (**16**). Energies (kJ mol<sup>-1</sup>) were computed using the CBS-QB3 composite approach and are relative to methylglyoxal (**1**).

**Table S1.** Experimental conditions of carbon monoxide–acetaldehyde ices including ice composition and thickness, irradiation parameters, and VUV photon energies.

| Exp. | Ice                                   | Composition of carbon monoxide to acetaldehyde | Thickness (nm) | Current (nA) | Irradiation time (s) | Dose (eV/carbon monoxide) | Dose (eV/acetaldehyde) | Photon energy (eV) |
|------|---------------------------------------|------------------------------------------------|----------------|--------------|----------------------|---------------------------|------------------------|--------------------|
| 1    | CO–CH <sub>3</sub> CHO                | 1.3 ± 0.4 : 1                                  | 750 ± 30       | –            | –                    | –                         | –                      | 11.10              |
| 2    | CO–CH <sub>3</sub> CHO                | 1.2 ± 0.4 : 1                                  | 750 ± 30       | 25 ± 2       | 300 ± 10             | 0.15 ± 0.03               | 0.30 ± 0.05            | 11.10              |
| 3    | CO–CD <sub>3</sub> CDO                | 1.9 ± 0.5 : 1                                  | 750 ± 30       | 23 ± 6       | 300 ± 10             | 0.14 ± 0.04               | 0.27 ± 0.08            | 11.10              |
| 4    | C <sup>18</sup> O–CH <sub>3</sub> CHO | 1.6 ± 0.5 : 1                                  | 750 ± 30       | 22 ± 1       | 300 ± 10             | 0.13 ± 0.02               | 0.26 ± 0.04            | 11.10              |
| 5    | CO–CH <sub>3</sub> CHO                | 1.2 ± 0.5 : 1                                  | 750 ± 30       | 24 ± 1       | 300 ± 10             | 0.15 ± 0.03               | 0.29 ± 0.04            | 9.87               |
| 6    | CO–CH <sub>3</sub> CHO                | 1.3 ± 0.6 : 1                                  | 770 ± 30       | 23 ± 1       | 300 ± 10             | 0.14 ± 0.03               | 0.27 ± 0.04            | 9.39               |
| 7    | CO–CH <sub>3</sub> CHO                | 1.3 ± 0.6 : 1                                  | 750 ± 30       | 22 ± 1       | 300 ± 10             | 0.13 ± 0.02               | 0.26 ± 0.04            | 8.77               |
| 8    | CO–CH <sub>3</sub> CHO                | 1.3 ± 0.5 : 1                                  | 750 ± 30       | 37 ± 1       | 1800 ± 10            | 1.35 ± 0.19               | 2.65 ± 0.37            | 8.77               |
| 9    | CO–CD <sub>3</sub> CDO                | 2.0 ± 0.4 : 1                                  | 750 ± 30       | 37 ± 1       | 1800 ± 10            | 1.35 ± 0.19               | 2.65 ± 0.37            | 8.77               |
| 10   | CO–CH <sub>3</sub> CHO                | 1.2 ± 0.5 : 1                                  | 750 ± 30       | 40 ± 5       | 1800 ± 10            | 1.46 ± 0.27               | 2.86 ± 0.52            | 7.60               |

**Table S2.** Vacuum ultraviolet (VUV) light generation parameters with an uncertainty of photon energies of less than 0.001 eV.

| VUV photon energy (eV)              | Nonlinear medium in four-wave mixing | $\omega_1$ laser wavelength (nm) | $\omega_1$ Dye | $\omega_2$ laser wavelength (nm) | $\omega_2$ Dye |
|-------------------------------------|--------------------------------------|----------------------------------|----------------|----------------------------------|----------------|
| 11.10<br>( $2\omega_1 + \omega_2$ ) | Xenon                                | 249.628                          | Coumarin 503   | 1064                             | –              |
| 9.87<br>( $2\omega_1 - \omega_2$ )  | Krypton                              | 212.556                          | Stilbene 420   | 690.323                          | LDS 698        |
| 9.39<br>( $2\omega_1 - \omega_2$ )  | Xenon                                | 222.566                          | Coumarin 450   | 707.956                          | LDS 698        |
| 8.77<br>( $2\omega_1 - \omega_2$ )  | Xenon                                | 249.628                          | Coumarin 503   | 1064                             | –              |
| 7.60<br>( $2\omega_1 - \omega_2$ )  | Xenon                                | 249.628                          | Coumarin 503   | 532                              | –              |

**Table S3.** Cartesian coordinates (Å), harmonic frequencies (cm<sup>-1</sup>), infrared (IR) intensities (km mol<sup>-1</sup>), and dipole moment (Debye) for methylglyoxal (**1**).

| Structure                                                                                                                                                                                      | Geometry |               |               | Frequency     | IR intensity |         |
|------------------------------------------------------------------------------------------------------------------------------------------------------------------------------------------------|----------|---------------|---------------|---------------|--------------|---------|
| 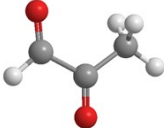 <p><b>1a</b></p> <p>Dipole moment (Debye)<br/>X: -0.3194<br/>Y: 0.9648<br/>Z: 0.0034<br/>Total: 1.0163</p>   | C        | -1.3485666413 | -0.0865833859 | -0.1387568206 | 73.6844      | 5.9247  |
|                                                                                                                                                                                                | C        | -0.2020053727 | -0.8117634665 | 0.5875264819  | 134.3589     | 15.1708 |
|                                                                                                                                                                                                | C        | 1.1128971011  | -0.0884710095 | 0.6895557506  | 247.5145     | 15.9045 |
|                                                                                                                                                                                                | O        | -1.2407178033 | 1.011307249   | -0.6167669781 | 470.1703     | 0.2564  |
|                                                                                                                                                                                                | H        | -2.2831390077 | -0.6831702047 | -0.1741067494 | 482.9286     | 25.0205 |
|                                                                                                                                                                                                | O        | -0.4261236507 | -1.9144390498 | 1.0298508391  | 570.7444     | 13.8849 |
|                                                                                                                                                                                                | H        | 0.97444606318 | 0.8703282326  | 1.1973571327  | 775.7253     | 14.4266 |
|                                                                                                                                                                                                | H        | 1.4879337211  | 0.1474148351  | -0.3106112943 | 906.4094     | 0.5899  |
|                                                                                                                                                                                                | H        | 1.8316910217  | -0.7034132001 | 1.2282616381  | 1007.7517    | 2.73    |
|                                                                                                                                                                                                |          |               |               |               | 1077.8641    | 2.8809  |
|                                                                                                                                                                                                |          |               |               |               | 1237.8913    | 23.1416 |
|                                                                                                                                                                                                |          |               |               |               | 1353.6507    | 1.9827  |
|                                                                                                                                                                                                |          |               |               |               | 1390.9208    | 39.7178 |
|                                                                                                                                                                                                |          |               |               |               | 1457.9117    | 16.1981 |
|                                                                                                                                                                                                |          |               |               | 1461.0255     | 11.5253      |         |
|                                                                                                                                                                                                |          |               |               | 1796.0035     | 105.8722     |         |
|                                                                                                                                                                                                |          |               |               | 1808.8035     | 117.1068     |         |
|                                                                                                                                                                                                |          |               |               | 2921.4344     | 96.88        |         |
|                                                                                                                                                                                                |          |               |               | 3039.8422     | 0.1128       |         |
|                                                                                                                                                                                                |          |               |               | 3094.5589     | 3.8097       |         |
|                                                                                                                                                                                                |          |               |               | 3151.0982     | 6.2718       |         |
|  <p><b>1b</b></p> <p>Dipole moment (Debye)<br/>X: 2.9920<br/>Y: -4.0393<br/>Z: 0.0019<br/>Total: 5.0267</p> | C        | -1.3563457277 | -0.0904932032 | -0.1275090571 | 77.5352      | 6.3843  |
|                                                                                                                                                                                                | C        | -0.1958976206 | -0.8078549864 | 0.6186189426  | 126.9107     | 0.3912  |
|                                                                                                                                                                                                | C        | 0.7001626138  | -1.6691801622 | -0.2388519645 | 261.5062     | 2.0017  |
|                                                                                                                                                                                                | O        | -2.1367423593 | 0.6219939773  | 0.4368904658  | 401.0387     | 3.202   |
|                                                                                                                                                                                                | H        | -1.4172783994 | -0.2804699189 | -1.2225179526 | 464.9074     | 0.8182  |
|                                                                                                                                                                                                | O        | -0.0636425059 | -0.6539831553 | 1.8048256573  | 464.9074     | 0.8182  |
|                                                                                                                                                                                                | H        | 1.1557836551  | -1.0703302086 | -1.0351117859 | 636.2775     | 18.786  |
|                                                                                                                                                                                                | H        | 0.115109424   | -2.4536573181 | -0.731498522  | 799.5861     | 27.5862 |
|                                                                                                                                                                                                | H        | 1.4786409199  | -2.1209250246 | 0.3732742164  | 877.0806     | 0.5883  |
|                                                                                                                                                                                                |          |               |               |               | 966.7175     | 32.0158 |
|                                                                                                                                                                                                |          |               |               |               | 1074.342     | 2.4631  |
|                                                                                                                                                                                                |          |               |               |               | 1175.1998    | 56.8531 |
|                                                                                                                                                                                                |          |               |               |               | 1385.0301    | 39.4458 |
|                                                                                                                                                                                                |          |               |               |               | 1402.4241    | 4.1224  |
|                                                                                                                                                                                                |          |               |               | 1459.5821     | 16.3435      |         |
|                                                                                                                                                                                                |          |               |               | 1468.2848     | 11.9457      |         |
|                                                                                                                                                                                                |          |               |               | 1803.406      | 182.6718     |         |
|                                                                                                                                                                                                |          |               |               | 1835.6309     | 34.4782      |         |
|                                                                                                                                                                                                |          |               |               | 2866.4125     | 117.4244     |         |
|                                                                                                                                                                                                |          |               |               | 3023.0739     | 1.5264       |         |
|                                                                                                                                                                                                |          |               |               | 3074.7805     | 7.3408       |         |
|                                                                                                                                                                                                |          |               |               | 3147.2186     | 5.9417       |         |

**Table S4.** Cartesian coordinates (Å), harmonic frequencies (cm<sup>-1</sup>), infrared (IR) intensities (kmol<sup>-1</sup>), and dipole moment (Debye) for propanedial (**18**).

| Structure                                                                                                                                                                                   | Geometry                                    | Frequency | IR intensity |
|---------------------------------------------------------------------------------------------------------------------------------------------------------------------------------------------|---------------------------------------------|-----------|--------------|
| 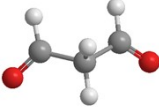 <p><b>18a</b><br/>Dipole moment (Debye)<br/>X: 0.0000<br/>Y: 3.3573<br/>Z: 1.2152<br/>Total: 3.5705</p>   | C -1.2984418333 -0.167478195 -0.153283553   | 63.4257   | 9.7117       |
|                                                                                                                                                                                             | C -0.163143146 -0.9833710855 0.4399534217   | 117.5762  | 1.6301       |
|                                                                                                                                                                                             | C 0.369554994 -2.0366277642 -0.5157632531   | 282.748   | 9.5357       |
|                                                                                                                                                                                             | O -2.35028177 0.0174428789 0.3964644604     | 452.1445  | 3.1478       |
|                                                                                                                                                                                             | O 0.5148074447 -3.1932814206 -0.2262110041  | 549.3128  | 29.1182      |
|                                                                                                                                                                                             | H -1.0919624814 0.2693379669 -1.1551770321  | 733.1112  | 2.3155       |
|                                                                                                                                                                                             | H -0.4713055483 -1.4405984487 1.3796373185  | 870.0173  | 19.3537      |
|                                                                                                                                                                                             | H 0.6640515491 -0.2812212163 0.6257154305   | 954.7325  | 75.9626      |
|                                                                                                                                                                                             | H 0.6327107913 -1.6633527156 -1.5299857887  | 1089.4891 | 1.4543       |
|                                                                                                                                                                                             |                                             | 1112.3929 | 31.1248      |
|                                                                                                                                                                                             |                                             | 1190.3469 | 35.0134      |
|                                                                                                                                                                                             |                                             | 1254.2659 | 7.3357       |
|                                                                                                                                                                                             |                                             | 1421.3375 | 6.9328       |
|                                                                                                                                                                                             |                                             | 1431.4666 | 6.117        |
|                                                                                                                                                                                             |                                             | 1435.0912 | 16.6722      |
|                                                                                                                                                                                             |                                             | 1807.0583 | 321.117      |
|                                                                                                                                                                                             | 1837.5543                                   | 102.0926  |              |
|                                                                                                                                                                                             | 2859.2571                                   | 11.8485   |              |
|                                                                                                                                                                                             | 2879.5205                                   | 208.9849  |              |
|                                                                                                                                                                                             | 2997.1427                                   | 1.623     |              |
|                                                                                                                                                                                             | 3129.0232                                   | 2.8236    |              |
|  <p><b>18b</b><br/>Dipole moment (Debye)<br/>X: 1.6835<br/>Y: 3.1146<br/>Z: 1.2840<br/>Total: 3.7661</p> | C -1.3144382211 -1.4789376217 -0.4252812173 | 40.2195   | 12.0726      |
|                                                                                                                                                                                             | C -0.1510509949 -0.912653016 0.3668664151   | 108.3346  | 0.7678       |
|                                                                                                                                                                                             | C 1.14065341 -0.7965624217 -0.4189443227    | 229.7122  | 11.6198      |
|                                                                                                                                                                                             | O -2.4198761764 -1.0048603916 -0.4010096601 | 462.8054  | 12.5021      |
|                                                                                                                                                                                             | O 1.2936728784 -1.2003182329 -1.5421523379  | 639.3883  | 5.0189       |
|                                                                                                                                                                                             | H -1.0830204255 -2.3776031996 -1.0285546152 | 697.4472  | 5.9348       |
|                                                                                                                                                                                             | H 0.0499145192 -1.5772000643 1.2212837932   | 857.7984  | 6.2403       |
|                                                                                                                                                                                             | H -0.4275469502 0.0580571768 0.7904949859   | 914.6311  | 9.5936       |
|                                                                                                                                                                                             | H 1.9704419605 -0.2990622289 0.1278369591   | 1061.3582 | 58.7593      |
|                                                                                                                                                                                             |                                             | 1091.9962 | 12.8524      |
|                                                                                                                                                                                             |                                             | 1214.9935 | 7.5318       |
|                                                                                                                                                                                             |                                             | 1307.3679 | 36.9695      |
|                                                                                                                                                                                             |                                             | 1411.2453 | 19.4173      |
|                                                                                                                                                                                             |                                             | 1415.9712 | 14.5308      |
|                                                                                                                                                                                             |                                             | 1432.0593 | 11.1684      |
|                                                                                                                                                                                             |                                             | 1809.8922 | 203.9804     |
|                                                                                                                                                                                             | 1823.9981                                   | 128.5002  |              |
|                                                                                                                                                                                             | 2882.52                                     | 131.9529  |              |
|                                                                                                                                                                                             | 2934.1665                                   | 70.4563   |              |
|                                                                                                                                                                                             | 2998.8611                                   | 2.0832    |              |
|                                                                                                                                                                                             | 3072.2047                                   | 4.6324    |              |

**Table S5.** Cartesian coordinates (Å), harmonic frequencies (cm<sup>-1</sup>), infrared (IR) intensities (km mol<sup>-1</sup>), and dipole moment (Debye) for 2-hydroxypropenone (**16**).

| Structure                                                                                                                                                                   | Geometry |               |               | Frequency     | IR intensity |          |
|-----------------------------------------------------------------------------------------------------------------------------------------------------------------------------|----------|---------------|---------------|---------------|--------------|----------|
| 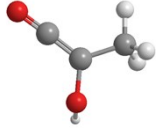 <p>Dipole moment (Debye)<br/>X: 2.2821<br/>Y: -0.8236<br/>Z: 1.4500<br/>Total: 2.8265</p> | O        | 0.3103291869  | -0.5432242651 | -1.9553186994 | 691.5249     | 1.907    |
|                                                                                                                                                                             | C        | 0.1630202061  | -0.2218488461 | -0.8428299774 | 765.2709     | 8.4858   |
|                                                                                                                                                                             | C        | 0.0049482677  | 0.1252435796  | 0.4207175729  | 996.5632     | 6.8124   |
|                                                                                                                                                                             | O        | 0.4359744058  | 1.4023976391  | 0.7972909485  | 1043.0043    | 4.7179   |
|                                                                                                                                                                             | C        | -0.5061980935 | -0.8163602942 | 1.4699341621  | 1198.1139    | 110.6414 |
|                                                                                                                                                                             | H        | -0.3434507905 | 1.960871279   | 0.9046852914  | 1275.0583    | 27.1237  |
|                                                                                                                                                                             | H        | -0.7195412064 | -1.803851527  | 1.0537501402  | 1410.4861    | 29.9699  |
|                                                                                                                                                                             | H        | -1.4310334153 | -0.439634701  | 1.9236293903  | 1416.5385    | 4.7732   |
|                                                                                                                                                                             | H        | 0.2364814392  | -0.9328428644 | 2.2661011714  | 1468.0557    | 9.0596   |
|                                                                                                                                                                             |          |               |               |               | 1507.3983    | 12.4262  |
|                                                                                                                                                                             |          |               |               |               | 2210.7729    | 525.24   |
|                                                                                                                                                                             |          |               |               |               | 3002.0864    | 38.2593  |
|                                                                                                                                                                             |          |               |               |               | 3052.9164    | 26.237   |
|                                                                                                                                                                             |          |               |               |               | 3097.4575    | 16.5393  |
|                                                                                                                                                                             |          |               |               |               | 3765.7384    | 29.4633  |



**Table S6.** Cartesian coordinates (Å), harmonic frequencies (cm<sup>-1</sup>), infrared (IR) intensities (kmol<sup>-1</sup>), and dipole moment (Debye) for 2-hydroxypropenal (**19**).

| Structure                                                                                                                                                                                     | Geometry                                    | Frequency | IR intensity |
|-----------------------------------------------------------------------------------------------------------------------------------------------------------------------------------------------|---------------------------------------------|-----------|--------------|
| 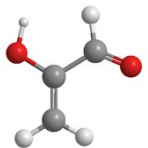 <p><b>19a</b><br/>Dipole moment (Debye)<br/>X: 1.4612<br/>Y: -1.6479<br/>Z: -0.0035<br/>Total: 2.2024</p>   | C -1.3257324546 -0.0474302748 -0.0077925995 | 158.5643  | 6.7495       |
|                                                                                                                                                                                               | C -0.2032685759 -0.7507325909 0.6746357479  | 247.004   | 109.5079     |
|                                                                                                                                                                                               | C 0.9493497327 -0.1293781276 0.9377294296   | 286.0181  | 9.4267       |
|                                                                                                                                                                                               | O -1.3134598894 1.0985641682 -0.377542114   | 432.5565  | 9.2891       |
|                                                                                                                                                                                               | H -2.2292266143 -0.6893182681 -0.1620261533 | 469.3063  | 6.4079       |
|                                                                                                                                                                                               | O -0.4163902717 -2.0560311392 1.0155415045  | 603.492   | 10.3984      |
|                                                                                                                                                                                               | H 1.0581026227 0.905105663 0.6445526415     | 737.4448  | 3.4833       |
|                                                                                                                                                                                               | H 1.76571659 -0.6370542142 1.4334215493     | 899.008   | 60.4998      |
|                                                                                                                                                                                               | H -1.3016411395 -2.3220952164 0.741299994   | 903.1035  | 53.9914      |
|                                                                                                                                                                                               |                                             | 979.099   | 50.7624      |
|                                                                                                                                                                                               |                                             | 1011.7238 | 0.5729       |
|                                                                                                                                                                                               |                                             | 1215.4258 | 40.6783      |
|                                                                                                                                                                                               |                                             | 1335.6847 | 231.7812     |
|                                                                                                                                                                                               |                                             | 1413.3089 | 33.3666      |
|                                                                                                                                                                                               |                                             | 1426.9986 | 6.723        |
|                                                                                                                                                                                               |                                             | 1692.6066 | 82.3906      |
|                                                                                                                                                                                               | 1808.1063                                   | 99.9871   |              |
|                                                                                                                                                                                               | 2803.1146                                   | 172.461   |              |
|                                                                                                                                                                                               | 3168.3921                                   | 2.3965    |              |
|                                                                                                                                                                                               | 3269.5002                                   | 0.0953    |              |
|                                                                                                                                                                                               | 3799.3483                                   | 51.8364   |              |
|  <p><b>19b</b><br/>Dipole moment (Debye)<br/>X: -1.5354<br/>Y: -1.9639<br/>Z: 0.0003<br/>Total: 2.4928</p> | C -1.2965728332 -0.063922938 -0.0152919337  | 205.3749  | 4.0187       |
|                                                                                                                                                                                               | C -0.2106035558 -0.772380307 0.6959297224   | 291.1645  | 23.546       |
|                                                                                                                                                                                               | C -0.132113346 -0.7560125419 2.032672035    | 409.284   | 2.0394       |
|                                                                                                                                                                                               | O -1.360403123 -0.083709883 -1.2271672313   | 532.2568  | 0.0128       |
|                                                                                                                                                                                               | H -2.032663418 0.4742544171 0.6075976557    | 581.9783  | 98.0849      |
|                                                                                                                                                                                               | O 0.6618404112 -1.4139362843 -0.108849827   | 683.8242  | 2.1752       |
|                                                                                                                                                                                               | H -0.8748061217 -0.2158747421 2.604339911   | 738.1645  | 13.9714      |
|                                                                                                                                                                                               | H 0.6572996782 -1.2702680967 2.5642364058   | 881.0345  | 63.3021      |
|                                                                                                                                                                                               | H 0.3542723085 -1.250509624 -1.0174467379   | 898.6639  | 52.5974      |
|                                                                                                                                                                                               |                                             | 984.7133  | 37.8731      |
|                                                                                                                                                                                               |                                             | 1007.395  | 0.0521       |
|                                                                                                                                                                                               |                                             | 1266.4532 | 63.4805      |
|                                                                                                                                                                                               |                                             | 1371.14   | 18.0169      |
|                                                                                                                                                                                               |                                             | 1409.7075 | 232.6025     |
|                                                                                                                                                                                               |                                             | 1448.7836 | 36.5058      |
|                                                                                                                                                                                               |                                             | 1717.1801 | 14.9187      |
|                                                                                                                                                                                               | 1756.0365                                   | 259.674   |              |
|                                                                                                                                                                                               | 2967.5354                                   | 64.0139   |              |
|                                                                                                                                                                                               | 3164.0893                                   | 0.0142    |              |
|                                                                                                                                                                                               | 3257.4972                                   | 1.7513    |              |
|                                                                                                                                                                                               | 3664.436                                    | 102.821   |              |

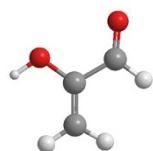

**19c**

Dipole moment  
(Debye)

X: -4.2780

Y: -1.6331

Z: 0.0000

Total: 4.5791

|   |               |               |               |
|---|---------------|---------------|---------------|
| C | -1.3971024091 | -1.4950276051 | 1.1076985536  |
| C | -0.1926135668 | -0.7339602269 | 0.6739764024  |
| C | -0.0565504781 | 0.5492209881  | 1.0347318379  |
| O | -1.6090532983 | -2.6481774907 | 0.835177467   |
| H | -2.1010147145 | -0.8931275502 | 1.7193905887  |
| O | 0.6685886086  | -1.4639424989 | -0.0722120627 |
| H | -0.8204921932 | 1.0222584618  | 1.6369264638  |
| H | 0.7974287956  | 1.1528006649  | 0.749123518   |
| H | 1.4215392557  | -0.915084743  | -0.3183027686 |

|           |          |
|-----------|----------|
| 164.6382  | 1.2857   |
| 273.5106  | 4.1576   |
| 423.0266  | 125.0331 |
| 430.6895  | 8.2425   |
| 522.9738  | 0.4342   |
| 659.1123  | 27.6319  |
| 726.6233  | 1.3647   |
| 865.6826  | 64.2762  |
| 877.7793  | 63.491   |
| 981.6836  | 20.7059  |
| 1016.7923 | 0.006    |
| 1199.8171 | 147.8404 |
| 1388.923  | 3.2494   |
| 1419.8639 | 24.7226  |
| 1458.807  | 13.2616  |
| 1686.4367 | 101.5033 |
| 1802.1916 | 235.4222 |
| 2899.6575 | 92.8123  |
| 3150.5067 | 2.7786   |
| 3239.2684 | 4.1331   |
| 3819.7464 | 43.9889  |

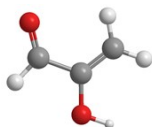

**19d**

Dipole moment  
(Debye)

X: 3.4795

Y: 0.2231

Z: 0.0000

Total: 3.4867

|   |               |               |               |
|---|---------------|---------------|---------------|
| C | -1.4064892456 | -1.4833003505 | 1.1215849359  |
| C | -0.2158253259 | -0.7321982596 | 0.6201598443  |
| C | -0.2315872261 | -0.0768327732 | -0.5431574961 |
| O | -2.4570193316 | -1.5609908655 | 0.5351702226  |
| H | -1.2381153251 | -1.9744399986 | 2.1012570808  |
| O | 0.8232459675  | -0.8258604485 | 1.4999460067  |
| H | -1.1372942407 | -0.0957722076 | -1.1331628642 |
| H | 0.6235986188  | 0.4721581067  | -0.9200297471 |
| H | 1.5804861087  | -0.3365532033 | 1.1605820172  |

|           |          |
|-----------|----------|
| 159.9836  | 7.721    |
| 284.1328  | 4.4523   |
| 392.4444  | 122.019  |
| 441.6726  | 12.0009  |
| 486.3537  | 3.0718   |
| 603.5144  | 13.7543  |
| 727.7701  | 2.8393   |
| 876.9063  | 55.298   |
| 901.0149  | 46.8113  |
| 973.1587  | 43.2255  |
| 1031.1843 | 0.2679   |
| 1167.3377 | 191.9868 |
| 1346.7241 | 0.5759   |
| 1425.8323 | 24.3833  |
| 1431.9774 | 24.7373  |
| 1684.1637 | 147.173  |
| 1808.0803 | 89.6747  |
| 2921.0295 | 104.6566 |
| 3151.3636 | 7.9936   |
| 3250.7445 | 0.5513   |
| 3826.9428 | 44.539   |

**Table S7.** Cartesian coordinates (Å), harmonic frequencies (cm<sup>-1</sup>), infrared (IR) intensities (kmol<sup>-1</sup>), and dipole moment (Debye) for 3-hydroxypropenal (**20**).

| Structure                                                                                                                                                                                    | Geometry                         | Frequency | IR intensity |
|----------------------------------------------------------------------------------------------------------------------------------------------------------------------------------------------|----------------------------------|-----------|--------------|
| 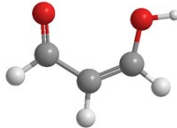 <p><b>20a</b><br/>Dipole moment (Debye)<br/>X: -4.0262<br/>Y: 2.9393<br/>Z: 0.0000<br/>Total: 4.9849</p>   | C 0. -0.3105118433 1.334912086   | 159.8987  | 2.5035       |
|                                                                                                                                                                                              | C 0. -1.0239181309 0.0544823451  | 190.0585  | 3.89         |
|                                                                                                                                                                                              | C 0. -0.460769553 -1.1683382615  | 325.6807  | 115.5542     |
|                                                                                                                                                                                              | O 0. 0.8920051039 1.4882918356   | 458.7611  | 18.0309      |
|                                                                                                                                                                                              | H 0. -0.9888237734 2.2176717607  | 495.9448  | 23.582       |
|                                                                                                                                                                                              | O 0. 0.8639794144 -1.3871868197  | 787.1323  | 30.2507      |
|                                                                                                                                                                                              | H 0. -1.0928662305 -2.0545569012 | 878.3505  | 19.6953      |
|                                                                                                                                                                                              | H 0. -2.1072553423 0.0937434622  | 922.6683  | 71.7678      |
|                                                                                                                                                                                              | H 0. 1.0345003552 -2.3338595072  | 974.9     | 0.6691       |
|                                                                                                                                                                                              |                                  | 1031.5775 | 5.4472       |
|                                                                                                                                                                                              |                                  | 1116.5034 | 16.3774      |
|                                                                                                                                                                                              |                                  | 1274.4851 | 81.7729      |
|                                                                                                                                                                                              |                                  | 1315.9093 | 205.0192     |
|                                                                                                                                                                                              |                                  | 1432.1376 | 3.7016       |
|                                                                                                                                                                                              |                                  | 1470.4759 | 22.0192      |
|                                                                                                                                                                                              |                                  | 1682.1779 | 303.6493     |
|                                                                                                                                                                                              |                                  | 1785.2423 | 146.3769     |
|                                                                                                                                                                                              | 2854.7557                        | 196.4424  |              |
|                                                                                                                                                                                              | 3126.2387                        | 15.6588   |              |
|                                                                                                                                                                                              | 3182.113                         | 9.9996    |              |
|                                                                                                                                                                                              | 3844.652                         | 124.2114  |              |
|  <p><b>20b</b><br/>Dipole moment (Debye)<br/>X: -0.6282<br/>Y: 3.1283<br/>Z: 0.0000<br/>Total: 3.1907</p> | C 0. 0.329485714 -1.2357997769   | 278.4153  | 7.9795       |
|                                                                                                                                                                                              | C 0. 1.0986072054 -0.0200895247  | 293.9169  | 4.3255       |
|                                                                                                                                                                                              | C 0. 0.4513111528 1.1804756372   | 395.8439  | 6.142        |
|                                                                                                                                                                                              | O 0. -0.9072844693 -1.262426978  | 521.2067  | 18.26        |
|                                                                                                                                                                                              | H 0. 0.8860694873 -2.1891226658  | 788.2107  | 35.1881      |
|                                                                                                                                                                                              | O 0. -0.8600193448 1.3174995882  | 896.9044  | 6.9645       |
|                                                                                                                                                                                              | H 0. 0.9826999082 2.1283995412   | 929.6361  | 71.1421      |
|                                                                                                                                                                                              | H 0. 2.1790679656 -0.0550585652  | 1001.0524 | 44.5141      |
|                                                                                                                                                                                              | H 0. -1.2343076192 0.3925027441  | 1012.4617 | 20.4751      |
|                                                                                                                                                                                              |                                  | 1043.0019 | 18.3627      |
|                                                                                                                                                                                              |                                  | 1115.9373 | 11.2576      |
|                                                                                                                                                                                              |                                  | 1291.9089 | 155.7593     |
|                                                                                                                                                                                              |                                  | 1400.7859 | 51.4475      |
|                                                                                                                                                                                              |                                  | 1407.0405 | 63.0864      |
|                                                                                                                                                                                              |                                  | 1475.5736 | 52.846       |
|                                                                                                                                                                                              |                                  | 1634.1752 | 267.6262     |
|                                                                                                                                                                                              |                                  | 1704.2931 | 204.5528     |
|                                                                                                                                                                                              | 2963.143                         | 121.7864  |              |
|                                                                                                                                                                                              | 3140.8929                        | 154.2756  |              |
|                                                                                                                                                                                              | 3189.8537                        | 76.3697   |              |
|                                                                                                                                                                                              | 3215.0294                        | 2.4332    |              |

|  |  |  |           |          |
|--|--|--|-----------|----------|
|  |  |  | 210.5211  | 12.4721  |
|  |  |  | 215.7994  | 49.7608  |
|  |  |  | 263.6568  | 3.3245   |
|  |  |  | 444.5599  | 105.682  |
|  |  |  | 447.8478  | 5.3998   |
|  |  |  | 753.6584  | 92.1523  |
|  |  |  | 847.5965  | 17.2491  |
|  |  |  | 992.5887  | 26.1592  |
|  |  |  | 998.5713  | 27.0044  |
|  |  |  | 1033.8961 | 0.5903   |
|  |  |  | 1175.6222 | 7.5389   |
|  |  |  | 1260.0647 | 198.3248 |
|  |  |  | 1345.6419 | 6.5224   |
|  |  |  | 1369.4857 | 179.9842 |
|  |  |  | 1430.9827 | 10.9735  |
|  |  |  | 1679.3859 | 437.1256 |
|  |  |  | 1775.9985 | 111.0015 |
|  |  |  | 2890.1746 | 168.2566 |
|  |  |  | 3156.5837 | 2.7136   |
|  |  |  | 3184.7179 | 5.2775   |
|  |  |  | 3842.9363 | 123.7711 |
|  |  |  | 209.7618  | 3.0483   |
|  |  |  | 210.8385  | 0.3837   |
|  |  |  | 263.6413  | 5.8202   |
|  |  |  | 449.261   | 7.5241   |
|  |  |  | 572.4657  | 93.0732  |
|  |  |  | 751.1318  | 71.8291  |
|  |  |  | 827.5731  | 39.0187  |
|  |  |  | 999.767   | 99.596   |
|  |  |  | 1018.8366 | 38.1564  |
|  |  |  | 1035.9132 | 6.8044   |
|  |  |  | 1162.265  | 146.155  |
|  |  |  | 1299.5918 | 8.5605   |
|  |  |  | 1323.9714 | 52.691   |
|  |  |  | 1400.8063 | 0.223    |
|  |  |  | 1433.7671 | 4.0478   |
|  |  |  | 1653.4555 | 596.5689 |
|  |  |  | 1776.3593 | 118.5084 |
|  |  |  | 2882.3347 | 167.5456 |
|  |  |  | 3148.6409 | 14.636   |
|  |  |  | 3202.6158 | 0.176    |
|  |  |  | 3787.2677 | 61.2518  |
|  |  |  | 162.3813  | 3.1374   |
|  |  |  | 204.6846  | 0.847    |
|  |  |  | 279.8592  | 127.9658 |
|  |  |  | 451.6196  | 11.1902  |
|  |  |  | 476.0536  | 16.2279  |
|  |  |  | 692.6553  | 13.9568  |
|  |  |  | 810.1836  | 45.4142  |
|  |  |  | 980.6541  | 0.6803   |
|  |  |  | 1020.994  | 116.2571 |

  

|                                                                                   |      |               |               |  |
|-----------------------------------------------------------------------------------|------|---------------|---------------|--|
| 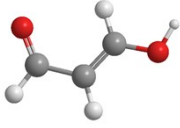 | C 0. | -0.4396051577 | -1.4475765735 |  |
|                                                                                   | C 0. | -0.7240237335 | -0.0104454632 |  |
|                                                                                   | C 0. | 0.2892149324  | 0.8695179335  |  |
|                                                                                   | O 0. | 0.6700914628  | -1.9448801872 |  |
|                                                                                   | H 0. | -1.3412805521 | -2.0954291609 |  |
|                                                                                   | O 0. | 0.0958511506  | 2.201299217   |  |
|                                                                                   | H 0. | 1.3151911021  | 0.5097884279  |  |
|                                                                                   | H 0. | -1.7536889618 | 0.328446852   |  |
|                                                                                   | H 0. | 0.9442197571  | 2.6551489545  |  |
| <b>20c</b>                                                                        |      |               |               |  |
| Dipole moment (Debye)                                                             |      |               |               |  |
| X: 2.9616                                                                         |      |               |               |  |
| Y: 0.1992                                                                         |      |               |               |  |
| Z: 0.0000                                                                         |      |               |               |  |
| Total: 2.9683                                                                     |      |               |               |  |

  

|                                                                                     |      |               |               |  |
|-------------------------------------------------------------------------------------|------|---------------|---------------|--|
|  | C 0. | -0.4338862553 | -1.4399627031 |  |
|                                                                                     | C 0. | -0.6968234103 | 0.0023408984  |  |
|                                                                                     | C 0. | 0.3233521095  | 0.8789415734  |  |
|                                                                                     | O 0. | 0.6664149204  | -1.9535058859 |  |
|                                                                                     | H 0. | -1.347624289  | -2.0719337583 |  |
|                                                                                     | O 0. | 0.2433697116  | 2.2172587632  |  |
|                                                                                     | H 0. | 1.3506077511  | 0.5331725783  |  |
|                                                                                     | H 0. | -1.731049304  | 0.336548967   |  |
|                                                                                     | H 0. | -0.682841234  | 2.491219567   |  |
| <b>20d</b>                                                                          |      |               |               |  |
| Dipole moment (Debye)                                                               |      |               |               |  |
| X: 2.6471                                                                           |      |               |               |  |
| Y: 3.2182                                                                           |      |               |               |  |
| Z: 0.0000                                                                           |      |               |               |  |
| Total: 4.1670                                                                       |      |               |               |  |

  

|                                                                                     |      |               |               |  |
|-------------------------------------------------------------------------------------|------|---------------|---------------|--|
|  | C 0. | 0.3648054847  | -1.0779509272 |  |
|                                                                                     | C 0. | -0.729387609  | -0.1071163015 |  |
|                                                                                     | C 0. | -0.5596408953 | 1.2247831825  |  |
|                                                                                     | O 0. | 0.1944460305  | -2.280117577  |  |
|                                                                                     | H 0. | 1.3857972295  | -0.6483647262 |  |
|                                                                                     | O 0. | 0.6607594807  | 1.8110990691  |  |
|                                                                                     | H 0. | -1.4131216637 | 1.8984201939  |  |
| <b>20e</b>                                                                          |      |               |               |  |
| Dipole moment (Debye)                                                               |      |               |               |  |
| X: -6.0057                                                                          |      |               |               |  |

|               |      |               |               |           |          |
|---------------|------|---------------|---------------|-----------|----------|
| Y: 0.1586     | H 0. | -1.7376768203 | -0.5030183139 | 1033.9043 | 1.877    |
| Z: 0.0000     | H 0. | 0.564998763   | 2.7671554004  | 1148.3736 | 33.6588  |
| Total: 6.0078 |      |               |               | 1249.3361 | 18.3138  |
|               |      |               |               | 1298.2161 | 267.2602 |
|               |      |               |               | 1393.2811 | 6.7297   |
|               |      |               |               | 1465.2152 | 16.286   |
|               |      |               |               | 1708.8881 | 143.7531 |
|               |      |               |               | 1761.0895 | 281.2062 |
|               |      |               |               | 2920.2493 | 79.5013  |
|               |      |               |               | 3142.7136 | 13.4044  |
|               |      |               |               | 3195.4977 | 3.6016   |
|               |      |               |               | 3863.1498 | 138.4099 |
|               |      |               |               | 167.742   | 7.599    |
|               |      |               |               | 216.4288  | 13.5399  |
|               |      |               |               | 314.5744  | 8.3495   |
|               |      |               |               | 476.8064  | 8.5071   |
|               |      |               |               | 573.0876  | 107.5598 |
|               |      |               |               | 698.5511  | 7.7633   |
|               |      |               |               | 821.8712  | 42.7736  |
|               |      |               |               | 991.9663  | 0.0323   |
|               |      |               |               | 1013.6442 | 85.4221  |
|               |      |               |               | 1025.7649 | 7.5172   |
|               |      |               |               | 1151.0359 | 103.7279 |
|               |      |               |               | 1237.7738 | 168.6832 |
|               |      |               |               | 1363.8141 | 6.2237   |
|               |      |               |               | 1404.3481 | 14.4096  |
|               |      |               |               | 1473.2109 | 19.768   |
|               |      |               |               | 1673.5908 | 238.5524 |
|               |      |               |               | 1767.5016 | 300.9672 |
|               |      |               |               | 2779.7369 | 161.7348 |
|               |      |               |               | 3181.2251 | 3.485    |
|               |      |               |               | 3200.1243 | 4.5389   |
|               |      |               |               | 3795.4202 | 35.6446  |
|               |      |               |               | 151.853   | 0.1462   |
|               |      |               |               | 222.1789  | 4.0125   |
|               |      |               |               | 322.4901  | 27.3819  |
|               |      |               |               | 423.1217  | 99.569   |
|               |      |               |               | 493.6045  | 9.7135   |
|               |      |               |               | 565.956   | 35.7823  |
|               |      |               |               | 858.4186  | 10.5887  |
|               |      |               |               | 970.6923  | 41.7144  |
|               |      |               |               | 1024.4799 | 1.3294   |
|               |      |               |               | 1141.5686 | 79.5854  |
|               |      |               |               | 1166.1719 | 17.3571  |
|               |      |               |               | 1217.5643 | 184.5488 |
|               |      |               |               | 1335.9267 | 211.0437 |
|               |      |               |               | 1356.6834 | 8.2269   |
|               |      |               |               | 1440.4173 | 4.797    |
|               |      |               |               | 1720.1445 | 221.9424 |
|               |      |               |               | 1772.5058 | 313.3378 |
|               |      |               |               | 2830.7036 | 133.7324 |

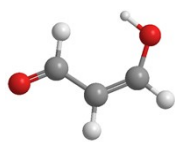

**20f**

Dipole moment  
(Debye)

X: -3.1854

Y: -0.6304

Z: 0.0000

Total: 3.2472

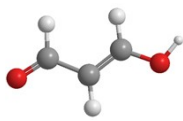

**20g**

Dipole moment  
(Debye)

X: 4.4373

Y: -3.6445

Z: 0.0000

Total: 5.7421

|  |  |  |           |          |
|--|--|--|-----------|----------|
|  |  |  | 3129.2715 | 14.7561  |
|  |  |  | 3191.007  | 1.4896   |
|  |  |  | 3846.2099 | 129.2742 |
|  |  |  | 153.7181  | 4.838    |
|  |  |  | 219.0258  | 18.8104  |
|  |  |  | 328.4563  | 21.3251  |
|  |  |  | 491.6946  | 0.4915   |
|  |  |  | 556.5436  | 84.5556  |
|  |  |  | 571.7957  | 3.8835   |
|  |  |  | 849.6213  | 26.9024  |
|  |  |  | 988.8478  | 47.6585  |
|  |  |  | 1029.6191 | 10.6349  |
|  |  |  | 1137.2908 | 334.3373 |
|  |  |  | 1161.6961 | 17.528   |
|  |  |  | 1241.3101 | 61.8383  |
|  |  |  | 1337.2375 | 17.4665  |
|  |  |  | 1381.9607 | 7.8929   |
|  |  |  | 1441.0921 | 5.9683   |
|  |  |  | 1689.4385 | 349.5535 |
|  |  |  | 1771.3154 | 284.9879 |
|  |  |  | 2848.2047 | 126.252  |
|  |  |  | 3157.4805 | 6.8307   |
|  |  |  | 3177.2999 | 6.1571   |
|  |  |  | 3790.1275 | 62.9968  |

  

|                                                                                                                                                                                                |   |    |               |               |
|------------------------------------------------------------------------------------------------------------------------------------------------------------------------------------------------|---|----|---------------|---------------|
| 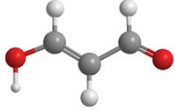 <p><b>20h</b><br/>Dipole moment<br/>(Debye)<br/>X: 3.6208<br/>Y: -0.6969<br/>Z: 0.0000<br/>Total: 3.6873</p> | C | 0. | -0.3613032576 | 1.3360939883  |
|                                                                                                                                                                                                | C | 0. | 0.3328034219  | 0.0533123401  |
|                                                                                                                                                                                                | C | 0. | -0.3635160757 | -1.095717293  |
|                                                                                                                                                                                                | O | 0. | 0.1846416543  | 2.4183017769  |
|                                                                                                                                                                                                | H | 0. | -1.4726820394 | 1.2595426034  |
|                                                                                                                                                                                                | O | 0. | 0.1262700704  | -2.3458074551 |
|                                                                                                                                                                                                | H | 0. | -1.4491267859 | -1.1045896671 |
|                                                                                                                                                                                                | H | 0. | 1.419174958   | 0.0722678344  |
|                                                                                                                                                                                                | H | 0. | 1.0917780539  | -2.3189141279 |

**Table S8.** Cartesian coordinates (Å) for transitions states of **TS1-19**, and **TS19-16**.

| Structure                                                                                           | Geometry |           |           |           |
|-----------------------------------------------------------------------------------------------------|----------|-----------|-----------|-----------|
| 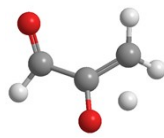<br><b>TS1-19</b>  | C        | -1.533221 | 0.022278  | -0.169685 |
|                                                                                                     | C        | -0.208303 | -0.430615 | 0.370671  |
|                                                                                                     | C        | 1.003961  | 0.273540  | 0.532689  |
|                                                                                                     | O        | -1.873335 | 1.176864  | -0.185197 |
|                                                                                                     | H        | -2.176248 | -0.807219 | -0.525399 |
|                                                                                                     | O        | -0.107566 | -1.626863 | 0.826121  |
|                                                                                                     | H        | 1.035441  | 1.351880  | 0.641986  |
|                                                                                                     | H        | 1.816421  | -0.142767 | -0.064321 |
|                                                                                                     | H        | 0.985050  | -1.041247 | 1.244874  |
| <br><b>TS19-16</b> | O        | 0.262221  | -0.802240 | -1.590891 |
|                                                                                                     | C        | -0.131275 | -0.444574 | -0.525166 |
|                                                                                                     | C        | 0.041305  | 0.368513  | 0.594446  |
|                                                                                                     | O        | 0.469841  | 1.646756  | 0.639275  |
|                                                                                                     | C        | -0.397899 | -0.487221 | 1.661613  |
|                                                                                                     | H        | -0.027320 | 2.138382  | 1.303435  |
|                                                                                                     | H        | -0.643765 | -1.340061 | 0.453599  |
|                                                                                                     | H        | -1.449747 | -0.691391 | 1.853394  |
|                                                                                                     | H        | 0.205988  | -0.523166 | 2.576735  |

**Table S9.** Absorption peaks observed in CO–CH<sub>3</sub>CHO ice before and after low dose irradiation (24 nA, 5 minutes) at 5 K. Vibration mode: stretching ( $\nu$ ), bending in plane ( $\delta$ ), and out of plane ( $\gamma$ ). Indication: asymmetric (*a*) and symmetric (*s*).

| Absorptions of pristine ice (cm <sup>-1</sup> )       |                                                                  |                                                             |
|-------------------------------------------------------|------------------------------------------------------------------|-------------------------------------------------------------|
| <b>CO</b>                                             |                                                                  | Assignment <sup>1</sup>                                     |
| 4249                                                  | 2 $\nu$ ( <sup>13</sup> CO)                                      | overtone                                                    |
| 2136                                                  | $\nu$ (CO)                                                       | $\nu$ (CO)                                                  |
| 2090                                                  | $\nu$ ( <sup>13</sup> CO)                                        | $\nu$ ( <sup>13</sup> CO)                                   |
| <b>CH<sub>3</sub>CHO</b>                              |                                                                  | Assignment <sup>2</sup>                                     |
| 3425                                                  | 2 $\nu_4$                                                        | overtone                                                    |
| 3123                                                  | $\nu_4 + \nu_6$                                                  | combination                                                 |
| 3007                                                  | $\nu_1$                                                          | $\nu_a$ (CH <sub>3</sub> )                                  |
| 2967                                                  | $\nu_{11}$                                                       | $\nu$ (CH <sub>3</sub> )                                    |
| 2918                                                  | $\nu_2$                                                          | $\nu_s$ (CH <sub>3</sub> )                                  |
| 2856, 2830                                            | 2 $\nu_6$                                                        | overtone                                                    |
| 2759, 2737                                            | $\nu_3$                                                          | $\nu$ (CH)                                                  |
| 2596                                                  | $\nu_4 + \nu_9$                                                  | combination                                                 |
| 2465                                                  | $\nu_7 + \nu_8$                                                  | combination                                                 |
| 2234                                                  | $\nu_7 + \nu_9$                                                  | combination                                                 |
| 2191                                                  | 2 $\nu_8$                                                        | overtone                                                    |
| 2158                                                  | $\nu_6 + \nu_{14}$                                               | combination                                                 |
| 1999                                                  | $\nu_8 + \nu_9$                                                  | combination                                                 |
| 1768                                                  | 2 $\nu_9$                                                        | overtone                                                    |
| 1722                                                  | $\nu_4$                                                          | $\nu$ (CO)                                                  |
| 1685                                                  | $\nu_4$ (CH <sub>3</sub> <sup>13</sup> CHO)                      | $\nu$ ( <sup>13</sup> CO)                                   |
| 1635                                                  | $\nu_8 + \nu_{10}$                                               | combination                                                 |
| 1543                                                  | 2 $\nu_{14}$                                                     | overtone                                                    |
| 1430                                                  | $\nu_5 / \nu_{12}$                                               | $\delta$ (CH <sub>3</sub> ) / $\delta_a$ (CH <sub>3</sub> ) |
| 1405                                                  | $\nu_9 + \nu_{10}$                                               | combination                                                 |
| 1389                                                  | $\nu_6$                                                          | $\delta$ (CH)                                               |
| 1349                                                  | $\nu_7$                                                          | $\delta_s$ (CH <sub>3</sub> )                               |
| 1122                                                  | $\nu_8$                                                          | $\gamma$ (CH <sub>3</sub> )                                 |
| 1107                                                  | $\nu_8$ ( <sup>13</sup> CH <sub>3</sub> CHO)                     | $\gamma$ ( <sup>13</sup> CH <sub>3</sub> )                  |
| 885                                                   | $\nu_{14} + \nu_{15}$                                            | combination                                                 |
| 772                                                   | $\nu_{14}$                                                       | $\gamma$ (CH)                                               |
| New absorptions after irradiation (cm <sup>-1</sup> ) |                                                                  |                                                             |
|                                                       |                                                                  | Assignment <sup>1, 3-5</sup>                                |
| 2343                                                  | $\nu_3$ (CO <sub>2</sub> )                                       |                                                             |
| 1852                                                  | $\nu_3$ (H $\dot{C}$ O)                                          |                                                             |
| 1841                                                  | $\nu_3$ (CH <sub>3</sub> $\dot{C}$ O) / $\nu_2$ (HO $\dot{C}$ O) |                                                             |
| 1571                                                  | $\nu_4$ ( $\dot{C}$ H <sub>2</sub> CHO)                          |                                                             |



**Table S10.** Absorption peaks observed in CO–CH<sub>3</sub>CHO ice before and after high dose irradiation (37 nA, 30 minutes) at 5 K. Vibration mode: stretching ( $\nu$ ), bending in plane ( $\delta$ ), and out of plane ( $\gamma$ ). Indication: asymmetric (*a*) and symmetric (*s*).

| Absorptions of pristine ice (cm <sup>-1</sup> )       |                                                                  |                                                             |
|-------------------------------------------------------|------------------------------------------------------------------|-------------------------------------------------------------|
| CO                                                    | Assignment <sup>1</sup>                                          |                                                             |
| 4249                                                  | 2 $\nu$ ( <sup>13</sup> CO)                                      | overtone                                                    |
| 2137                                                  | $\nu$ (CO)                                                       | $\nu$ (CO)                                                  |
| 2091                                                  | $\nu$ ( <sup>13</sup> CO)                                        | $\nu$ ( <sup>13</sup> CO)                                   |
| CH <sub>3</sub> CHO                                   | Assignment <sup>2</sup>                                          |                                                             |
| 3425                                                  | 2 $\nu_4$                                                        | overtone                                                    |
| 3008                                                  | $\nu_1$                                                          | $\nu_a$ (CH <sub>3</sub> )                                  |
| 2975                                                  | $\nu_{11}$                                                       | $\nu$ (CH <sub>3</sub> )                                    |
| 2918                                                  | $\nu_2$                                                          | $\nu_s$ (CH <sub>3</sub> )                                  |
| 2856, 2824                                            | 2 $\nu_6$                                                        | overtone                                                    |
| 2761, 2738                                            | $\nu_3$                                                          | $\nu$ (CH)                                                  |
| 2597                                                  | $\nu_4 + \nu_9$                                                  | combination                                                 |
| 2465                                                  | $\nu_7 + \nu_8$                                                  | combination                                                 |
| 2228                                                  | $\nu_7 + \nu_9$                                                  | combination                                                 |
| 2184                                                  | 2 $\nu_8$                                                        | overtone                                                    |
| 2154                                                  | $\nu_6 + \nu_{14}$                                               | combination                                                 |
| 2001                                                  | $\nu_8 + \nu_9$                                                  | combination                                                 |
| 1768                                                  | 2 $\nu_9$                                                        | overtone                                                    |
| 1721                                                  | $\nu_4$                                                          | $\nu$ (CO)                                                  |
| 1683                                                  | $\nu_4$ (CH <sub>3</sub> <sup>13</sup> CHO)                      | $\nu$ ( <sup>13</sup> CO)                                   |
| 1635                                                  | $\nu_8 + \nu_{10}$                                               | combination                                                 |
| 1541                                                  | 2 $\nu_{14}$                                                     | overtone                                                    |
| 1430                                                  | $\nu_5 / \nu_{12}$                                               | $\delta$ (CH <sub>3</sub> ) / $\delta_a$ (CH <sub>3</sub> ) |
| 1405                                                  | $\nu_9 + \nu_{10}$                                               | combination                                                 |
| 1389                                                  | $\nu_6$                                                          | $\delta$ (CH)                                               |
| 1350                                                  | $\nu_7$                                                          | $\delta_s$ (CH <sub>3</sub> )                               |
| 1122                                                  | $\nu_8$                                                          | $\gamma$ (CH <sub>3</sub> )                                 |
| 1107                                                  | $\nu_8$ ( <sup>13</sup> CH <sub>3</sub> CHO)                     | $\gamma$ ( <sup>13</sup> CH <sub>3</sub> )                  |
| 885                                                   | $\nu_{14} + \nu_{15}$                                            | combination                                                 |
| 772                                                   | $\nu_{14}$                                                       | $\gamma$ (CH)                                               |
| New absorptions after irradiation (cm <sup>-1</sup> ) |                                                                  |                                                             |
| Assignment <sup>1, 3-5</sup>                          |                                                                  |                                                             |
| 3343                                                  | $\nu$ (OH)                                                       |                                                             |
| 2941                                                  | $\nu$ (CH)                                                       |                                                             |
| 2343                                                  | $\nu_3$ (CO <sub>2</sub> )                                       |                                                             |
| 1304                                                  | $\nu_4$ (CH <sub>4</sub> )                                       |                                                             |
| 1852                                                  | $\nu_3$ (H $\dot{C}$ O)                                          |                                                             |
| 1841                                                  | $\nu_3$ (CH <sub>3</sub> $\dot{C}$ O) / $\nu_2$ (HO $\dot{C}$ O) |                                                             |
| 1571                                                  | $\nu_4$ ( $\dot{C}$ H <sub>2</sub> CHO)                          |                                                             |

**Table S11.** Absorption peaks observed in CO–CD<sub>3</sub>CDO ice before and after low dose irradiation (23 nA, 5 minutes) at 5 K. Vibration mode: stretching ( $\nu$ ), bending in plane ( $\delta$ ), and out of plane ( $\gamma$ ). Indication: asymmetric (*a*) and symmetric (*s*).

| Absorptions of pristine ice (cm <sup>-1</sup> )       |                                             |                               |
|-------------------------------------------------------|---------------------------------------------|-------------------------------|
| <b>CO</b>                                             | Assignment <sup>1</sup>                     |                               |
| 4250                                                  | 2 $\nu$ ( <sup>13</sup> CO)                 | overtone                      |
| 2136                                                  | $\nu$ (CO)                                  | $\nu$ (CO)                    |
| 2088                                                  | $\nu$ ( <sup>13</sup> CO)                   | $\nu$ ( <sup>13</sup> CO)     |
| <b>CD<sub>3</sub>CDO</b>                              | Assignment <sup>2</sup>                     |                               |
| 3397                                                  | 2 $\nu_4$                                   | overtone                      |
| 2472                                                  | $\nu_4 + \nu_9$                             | combination                   |
| 2312                                                  | 2 $\nu_5$                                   | overtone                      |
| 2258                                                  | $\nu_1$                                     | $\nu_a$ (CD <sub>3</sub> )    |
| 2222                                                  | $\nu_{11}$                                  | $\nu$ (CD <sub>3</sub> )      |
| 2183                                                  | $\nu_5 + \nu_7$                             | combination                   |
| 2104, 2066                                            | $\nu_2$                                     | $\nu_s$ (CD <sub>3</sub> )    |
| 1991                                                  | $\nu_6 + \nu_{13}$                          | combination                   |
| 1906                                                  | $\nu_5 + \nu_9$                             | combination                   |
| 1714                                                  | $\nu_4$                                     | $\nu$ (CO)                    |
| 1696                                                  | $\nu_8 + \nu_9$                             | overtone                      |
| 1669                                                  | $\nu_4$ (CD <sub>3</sub> <sup>13</sup> CDO) | $\nu$ ( <sup>13</sup> CO)     |
| 1521                                                  | 2 $\nu_{14}$                                | overtone                      |
| 1157                                                  | $\nu_5$                                     | $\nu$ (CC)                    |
| 1043                                                  | $\nu_{12}$                                  | $\delta$ (CD <sub>3</sub> )   |
| 1023                                                  | $\nu_6$                                     | $\delta_a$ (CD <sub>3</sub> ) |
| 953                                                   | $\nu_{13}$                                  | $\gamma$ (CD)                 |
| 941                                                   | $\nu_8$                                     | $\delta_s$ (CD <sub>3</sub> ) |
| New absorptions after irradiation (cm <sup>-1</sup> ) |                                             |                               |
|                                                       | Assignment <sup>1, 3, 4</sup>               |                               |
| 2343                                                  | $\nu_3$ (CO <sub>2</sub> )                  |                               |
| 1851                                                  | $\nu_3$ (CD <sub>3</sub> $\dot{C}$ O)       |                               |
| 1797                                                  | $\nu_3$ (D $\dot{C}$ O)                     |                               |
| 1787                                                  | $\nu_2$ (DO $\dot{C}$ O)                    |                               |
| 1513                                                  | $\nu_4$ ( $\dot{C}$ D <sub>2</sub> CDO)     |                               |

**Table S12.** Absorption peaks observed in CO–CD<sub>3</sub>CDO ice before and after high dose irradiation (37 nA, 30 minutes) at 5 K. Vibration mode: stretching ( $\nu$ ), bending in plane ( $\delta$ ), and out of plane ( $\gamma$ ). Indication: asymmetric (*a*) and symmetric (*s*).

| Absorptions of pristine ice (cm <sup>-1</sup> )       |                               |                               |
|-------------------------------------------------------|-------------------------------|-------------------------------|
| CO                                                    | Assignment <sup>1</sup>       |                               |
| 4250                                                  | 2 $\nu$ (CO)                  | overtone                      |
| 2136                                                  | $\nu$ (CO)                    | $\nu$ (CO)                    |
| 2087                                                  | $\nu$ ( <sup>13</sup> CO)     | $\nu$ ( <sup>13</sup> CO)     |
| CD <sub>3</sub> CDO                                   | Assignment <sup>2</sup>       |                               |
| 3394                                                  | 2 $\nu_4$                     | overtone                      |
| 2462                                                  | $\nu_4 + \nu_9$               | combination                   |
| 2253                                                  | $\nu_1$                       | $\nu_a$ (CD <sub>3</sub> )    |
| 2226                                                  | $\nu_{11}$                    | $\nu$ (CD <sub>3</sub> )      |
| 2187                                                  | $\nu_5 + \nu_7$               | combination                   |
| 2103, 2067                                            | $\nu_2$                       | $\nu_s$ (CD <sub>3</sub> )    |
| 1906                                                  | $\nu_5 + \nu_9$               | combination                   |
| 1714                                                  | $\nu_4$                       | $\nu$ (CO)                    |
| 1695                                                  | $\nu_8 + \nu_9$               | overtone                      |
| 1521                                                  | 2 $\nu_{14}$                  | overtone                      |
| 1158                                                  | $\nu_5$                       | $\nu$ (CC)                    |
| 1043                                                  | $\nu_{12}$                    | $\delta$ (CD <sub>3</sub> )   |
| 1022                                                  | $\nu_6$                       | $\delta_a$ (CD <sub>3</sub> ) |
| 953                                                   | $\nu_{13}$                    | $\gamma$ (CD)                 |
| 941                                                   | $\nu_8$                       | $\delta_s$ (CD <sub>3</sub> ) |
| New absorptions after irradiation (cm <sup>-1</sup> ) |                               |                               |
| Assignment <sup>1, 3, 4, 6</sup>                      |                               |                               |
| 2498                                                  | $\nu$ (OD)                    |                               |
| 2342                                                  | $\nu_3$ (CO <sub>2</sub> )    |                               |
| 1851                                                  | $\nu_3$ (CD <sub>3</sub> ĊO)  |                               |
| 1794                                                  | $\nu_3$ (DĊO)                 |                               |
| 1786                                                  | $\nu_2$ (DOĊO)                |                               |
| 1578                                                  | $\nu$ (C=C) / $\nu$ (C=O)     |                               |
| 1513                                                  | $\nu_4$ (ĊD <sub>2</sub> CDO) |                               |

**Table S13.** Absorption peaks observed in C<sup>18</sup>O–CH<sub>3</sub>CHO ice before and after low dose irradiation (22 nA, 5 minutes) at 5 K. Vibration mode: stretching ( $\nu$ ), bending in plane ( $\delta$ ), and out of plane ( $\gamma$ ). Indication: asymmetric (*a*) and symmetric (*s*).

| Absorptions of pristine ice (cm <sup>-1</sup> )       |                                               |                                                             |
|-------------------------------------------------------|-----------------------------------------------|-------------------------------------------------------------|
| <b>C<sup>18</sup>O</b>                                |                                               | Assignment <sup>7</sup>                                     |
| 4148                                                  | 2 $\nu$ (C <sup>18</sup> O)                   | overtone                                                    |
| 2136                                                  | $\nu$ (CO)                                    | $\nu$ (CO)                                                  |
| 2086                                                  | $\nu$ (C <sup>18</sup> O)                     | $\nu$ (C <sup>18</sup> O)                                   |
| <b>CH<sub>3</sub>CHO</b>                              |                                               | Assignment <sup>2</sup>                                     |
| 3426                                                  | 2 $\nu_4$                                     | overtone                                                    |
| 3124                                                  | $\nu_4 + \nu_6$                               | combination                                                 |
| 3007                                                  | $\nu_1$                                       | $\nu_a$ (CH <sub>3</sub> )                                  |
| 2966                                                  | $\nu_{11}$                                    | $\nu$ (CH <sub>3</sub> )                                    |
| 2918                                                  | $\nu_2$                                       | $\nu_s$ (CH <sub>3</sub> )                                  |
| 2855, 2836                                            | 2 $\nu_6$                                     | overtone                                                    |
| 2760, 2737                                            | $\nu_3$                                       | $\nu$ (CH)                                                  |
| 2597                                                  | $\nu_4 + \nu_9$                               | combination                                                 |
| 2464                                                  | $\nu_7 + \nu_8$                               | combination                                                 |
| 2235                                                  | $\nu_7 + \nu_9$                               | combination                                                 |
| 2191                                                  | 2 $\nu_8$                                     | overtone                                                    |
| 2154                                                  | $\nu_6 + \nu_{14}$                            | combination                                                 |
| 2002                                                  | $\nu_8 + \nu_9$                               | combination                                                 |
| 1766                                                  | 2 $\nu_9$                                     | overtone                                                    |
| 1723                                                  | $\nu_4$                                       | $\nu$ (CO)                                                  |
| 1684                                                  | $\nu_4$ (CH <sub>3</sub> <sup>13</sup> CHO)   | $\nu$ ( <sup>13</sup> CO)                                   |
| 1637                                                  | $\nu_8 + \nu_{10}$                            | combination                                                 |
| 1541                                                  | 2 $\nu_{14}$                                  | overtone                                                    |
| 1430                                                  | $\nu_5 / \nu_{12}$                            | $\delta$ (CH <sub>3</sub> ) / $\delta_a$ (CH <sub>3</sub> ) |
| 1405                                                  | $\nu_9 + \nu_{10}$                            | combination                                                 |
| 1389                                                  | $\nu_6$                                       | $\delta$ (CH)                                               |
| 1349                                                  | $\nu_7$                                       | $\delta_s$ (CH <sub>3</sub> )                               |
| 1121                                                  | $\nu_8$                                       | $\gamma$ (CH <sub>3</sub> )                                 |
| 1109                                                  | $\nu_8$ ( <sup>13</sup> CH <sub>3</sub> CHO)  | $\gamma$ ( <sup>13</sup> CH <sub>3</sub> )                  |
| 884                                                   | $\nu_{14} + \nu_{15}$                         | combination                                                 |
| 772                                                   | $\nu_{14}$                                    | $\gamma$ (CH)                                               |
| New absorptions after irradiation (cm <sup>-1</sup> ) |                                               |                                                             |
|                                                       |                                               | Assignment <sup>4, 5</sup>                                  |
| 1843                                                  | $\nu_3$ (CH <sub>3</sub> ĊO) / $\nu_2$ (HOĊO) |                                                             |
| 1570                                                  | $\nu_4$ (ĊH <sub>2</sub> CHO)                 |                                                             |

**Table S14.** Error analysis of adiabatic ionization energies (IEs) and relative energies ( $\Delta E$ ) of methylglyoxal (**1**) and its enol tautomers (**16** and **19**); IEs and  $\Delta E$  were computed at CBS–QB3 level of theory including the zero-point vibrational energy (ZPVE) corrections. The IE ranges are corrected for the thermal and Stark effect by  $-0.03$  eV and the combined error limits of  $-0.05/+0.03$  eV.<sup>8</sup>

| Name               | Isomer     | $\Delta E$<br>(kJ mol <sup>-1</sup> ) | Computed<br>IE (eV) | Corrected IE<br>ranges (eV) |
|--------------------|------------|---------------------------------------|---------------------|-----------------------------|
| Methylglyoxal      | <b>1a</b>  | 0.0                                   | 9.60                | 9.52 – 9.60                 |
|                    | <b>1b</b>  | 21.9                                  | 9.37                | 9.29 – 9.37                 |
| 2-Hydroxypropenone | <b>16</b>  | 85.7                                  | 8.17                | 8.09 – 8.17                 |
| 2-Hydroxypropenal  | <b>19a</b> | 45.4                                  | 9.53                | 9.45 – 9.53                 |
|                    | <b>19b</b> | 15.2                                  | 9.64                | 9.56 – 9.64                 |
|                    | <b>19c</b> | 39.4                                  | 9.78                | 9.70 – 9.78                 |
|                    | <b>19d</b> | 38.9                                  | 9.60                | 9.52 – 9.60                 |

**Table S15.** Error analysis of IEs and relative energies ( $\Delta E$ ) of propanedial (**18**) and its enol tautomer 3-hydroxypropenal (**20**); IEs and  $\Delta E$  were computed at CBS–QB3 level of theory including the ZPVE corrections. The IE ranges are corrected for the thermal and Stark effect by  $-0.03$  eV and the combined error limits of  $-0.05/+0.03$  eV.<sup>8</sup>

| Name              | Isomer     | $\Delta E$<br>(kJ mol <sup>-1</sup> ) | Computed<br>IE (eV) | Corrected IE<br>ranges (eV) |
|-------------------|------------|---------------------------------------|---------------------|-----------------------------|
| Propanedial       | <b>18a</b> | 23.8                                  | 10.21               | 10.13 – 10.21               |
|                   | <b>18b</b> | 18.9                                  | 10.08               | 10.00 – 10.08               |
| 3-Hydroxypropenal | <b>20a</b> | 50.7                                  | 9.48                | 9.40 – 9.48                 |
|                   | <b>20b</b> | 1.7                                   | 9.55                | 9.47 – 9.55                 |
|                   | <b>20c</b> | 35.9                                  | 9.49                | 9.41 – 9.49                 |
|                   | <b>20d</b> | 34.3                                  | 9.60                | 9.52 – 9.60                 |
|                   | <b>20e</b> | 37.8                                  | 9.63                | 9.57 – 9.63                 |
|                   | <b>20f</b> | 38.1                                  | 9.79                | 9.71 – 9.79                 |
|                   | <b>20g</b> | 30.9                                  | 9.67                | 9.59 – 9.67                 |
|                   | <b>20h</b> | 26.5                                  | 9.78                | 9.70 – 9.78                 |

**Supplementary Source code.** The source code of the program for conformer sorting.

```
def generate_input(filename):

    with open(filename + '.gif','r') as file:
        data = file.read()

    data = data.split('\n\n')[:-1]

    del(file)

    from re import search, MULTILINE

    variables = []
    old_variables = []

    for line in data[4].split('\n'):
        match = search(r'^\s*(?P<variable_name>\w\d+)\s+(?P<variable_value>-
?\d+\.\d+)\s*(?P<number_of_scan_steps>(?:\d+)?)\s*(?P<scan_step_size>(?:-\d+\.\d+)?)$', line,
        flags = MULTILINE)
        if match['number_of_scan_steps'] == "" and match['scan_step_size'] == "":
            for index, item in enumerate(variables):
                variables[index] = item + line + '\n'
        else:
            old_variables = variables[:]
            variables = []
            pattern = (' '* 3) + '{var_name}' + (' '* 13) + '{var_value}'
            name = match['variable_name']
            initial_value = float(match['variable_value'])
            number_of_scan_steps = int(match['number_of_scan_steps'])
            scan_step_size = float(match['scan_step_size'])
            for scan_step in range(number_of_scan_steps):
                value = (initial_value + scan_step_size * scan_step)
                if value > 180:
                    value = value - 360
                if value <= -180:
                    value = value + 360
                tmp = pattern.format(var_name = name, var_value = value)
                for item in old_variables:
                    variables.append(item + tmp + '\n')

    del(old_variables, line, match, index, item, pattern, name, initial_value, number_of_scan_steps,
    scan_step_size, scan_step, value, tmp)

    pattern_neutral_cbs = ""%nprocshared={nproc}
    %Chk={chk_name}_neutral_{conformer}.chk
```

```

# cbs-qb3 int(grid=ultrafine)

{title}\t\tneutral {conformer}

{molecule_specification}

{variables_data}'''

pattern_ion_cbs = ""%nprocshared={nproc}
%Chk={chk_name}_ion_{conformer}.chk
%OldChk={chk_name}_neutral_{conformer}.chk

# cbs-qb3 int(grid=ultrafine) Geom=Check

{title}\t\tion {conformer}

1 2
'''

number_of_processors_per_node = 16

initial_chk_name = search(r'^%[Cc]hk=(?P<initial_chk_name>.+)\.chk$', data[0], flags =
MULTILINE)['initial_chk_name']

neutral_conformers_preopt = variables[:]
ion_conformers_preopt = []
cbs = []

for index, item in enumerate(neutral_conformers_preopt):
    neutral_conformers_preopt[index] = pattern_neutral_cbs.format(nproc =
number_of_processors_per_node,
        chk_name = initial_chk_name,
        conformer = index + 1,
        title = data[2],
        molecule_specification = data[3],
        variables_data = item)
    ion_conformers_preopt.append(pattern_ion_cbs.format(nproc =
number_of_processors_per_node,
        chk_name = initial_chk_name,
        conformer = index + 1,
        title = data[2]))

neutral_conformers_preopt = '\n--Link1--\n'.join(neutral_conformers_preopt)
ion_conformers_preopt = '\n--Link1--\n'.join(ion_conformers_preopt)

```



```
gjf_content = '\n--Link1--\n'.join((neutral_conformers_preopt, ion_conformers_preopt))
gjf_content = gjf_content + '\n' * 5

del(pattern_neutral_cbs, pattern_ion_cbs, number_of_processors_per_node, initial_chk_name,
neutral_conformers_preopt, ion_conformers_preopt, cbs, index, item)

with open(filename + '.txt', 'w') as file:
    file.write(gjf_content)

del(file)

#%%% Generating inputs

generate_input('C:\MP
calculation\IP\H_CO_CHOH_CH3_enol_tautomer\H_CO_CHOH_CH3_enol_conformers_initia
l')
```

## Supplementary References

1. M. Bouilloud, N. Fray, Y. Benilan, H. Cottin, M. C. Gazeau and A. Jolly, *Mon. Not. R. Astron. Soc.*, 2015, **451**, 2145-2160.
2. J. S. Crighton and S. Bell, *J. Mol. Spectrosc.*, 1985, **112**, 285-303.
3. A. K. Eckhardt, A. Bergantini, S. K. Singh, P. R. Schreiner and R. I. Kaiser, *Angew. Chem. Int. Ed.*, 2019, **58**, 5663-5667.
4. M. E. Jacox, *Chem. Phys.*, 1982, **69**, 407-422.
5. R. L. Hudson, *Phys. Chem. Chem. Phys.*, 2018, **20**, 5389-5398.
6. G. Socrates, *Infrared and raman characteristic group frequencies: Tables and charts*, John Wiley & Sons, Ltd., New York, 2004.
7. S. Maity, R. I. Kaiser and B. M. Jones, *Phys. Chem. Chem. Phys.*, 2015, **17**, 3081-3114.
8. C. Zhu, N. F. Kleimeier, A. M. Turner, S. K. Singh, R. C. Fortenberry and R. I. Kaiser, *Proc. Natl. Acad. Sci. U.S.A.*, 2022, **119**, e2111938119.
